# Supplementary material
Source: PubMed Central journal article supplement (PMC8097498)
Supplement: jama-e214172-s001.pdf [file jama-e214172-s001.pdf]

## Supplemental Online Content

Syversen SW, Goll GL, Jørgensen KK, et al. Effect of therapeutic drug monitoring vs standard therapy during infliximab induction on disease remission in patients with chronic immune-mediated inflammatory diseases: a randomized clinical trial. *JAMA*. Published May 4, 2021. doi:10.1001/jama.2021.4172

**eAppendix 1.** The NOR-DRUM Steering Group

**eAppendix 2.** Principal Investigators From Each Study Center

**eTable 1.** Number of Randomized Patients by Study Hospital

**eTable 2.** Changes in Medication During the Trial

**eTable 3.** Details of Study Endpoints

**eTable 4.** Prespecified Secondary Outcomes

**eTable 5.** Demographic and Baseline Characteristics in Disease Subgroups

**eTable 6.** Sensitivity Analyses of the Primary Endpoint

**eTable 7.** Results Secondary Endpoints

**eTable 8.** Secondary Efficacy Endpoints (by Disease Subgroup)

**eTable 9.** Infliximab Discontinuation

**eFigure 1.** Treatment Algorithm in the Therapeutic Drug Monitoring Group

**eFigure 2.** Serum Infliximab Level

**eFigure 3.** Secondary Efficacy Outcomes (Box and Whiskers Plots)

**eReferences**

This supplemental material has been provided by the authors to give readers additional information about their work.

## **eAppendix 1. The NOR-DRUM Steering Group**

|                            |                                                                                                                                                                                |
|----------------------------|--------------------------------------------------------------------------------------------------------------------------------------------------------------------------------|
| Principal Investigator     | Professor Espen A. Haavardsholm, M.D., Ph.D.                                                                                                                                   |
| Project leader             | Silje W. Syversen, M.D., Ph.D.                                                                                                                                                 |
| National medical leaders   | Professor Tore K. Kvien, M.D., Ph.D., Rheumatology<br>Professor Jørgen Jahnsen, M.D., Ph.D., Gastroenterology<br>Cato Mørk, M.D., Ph.D., Dermatology                           |
| National laboratory leader | Nils Bolstad, M.D., Ph.D.                                                                                                                                                      |
| Biostatisticians           | Joseph Sexton, Ph.D.<br>Inge Christoffer Olsen, Ph.D.                                                                                                                          |
| Clinical coordinators      | Guro L. Goll, M.D., Ph.D., Rheumatology<br>Kristin K. Jørgensen, M.D., Ph.D., Gastroenterology<br>Øystein Sandanger, M.D., Ph.D., Dermatology                                  |
| Laboratory coordinators    | Johanna Gehin, M.D.<br>David J. Warren, Ph.D.                                                                                                                                  |
| PhD fellow                 | Marthe Kirkesæther Brun, M.D.                                                                                                                                                  |
| User representatives       | Jon Hagfors, The Norwegian Rheumatism Association<br>Bjørn Gulbrandsen, The Norwegian IBD Patient Organisation<br>Hilde Mellum, The Psoriasis and Eczema Association of Norway |

## **eAppendix 2. Principal Investigators From Each Study Center**

Lars Normann Karlsen, Geir Noraberg, Camilla Zettel, Maud Kristine Aga Ljoså, Anne Julsrud Haugen, Rune Johan Njålla, Trude Jannecke Bruun, Kathrine Aglen Seeberg, Brigitte Michelsen, Eldri Kveine Strand, Svanaug Skorpe, Ingrid Marianne Blomgren, Yngvill Hovde Bragenes, Christian Dotterud, Turid Thune, Carl Magnus Ystrøm, Roald Torp, Pawel Mielnik

**eTable 1. Number of Randomized Patients by Study Hospital**

|                                                              | <b>Therapeutic drug monitoring<br/>(n=198)</b> | <b>Standard therapy<br/>(n=200)</b> |
|--------------------------------------------------------------|------------------------------------------------|-------------------------------------|
| Diakonhjemmet Hospital, Oslo <sup>a</sup>                    | 65                                             | 70                                  |
| Akershus University Hospital, Lørenskog <sup>b</sup>         | 38                                             | 36                                  |
| Hospital of Southern Norway Trust, Arendal <sup>b</sup>      | 8                                              | 12                                  |
| Stavanger University Hospital <sup>b</sup>                   | 10                                             | 10                                  |
| Betanien Hospital, Skien <sup>a</sup>                        | 8                                              | 10                                  |
| Ålesund Hospital <sup>a</sup>                                | 10                                             | 6                                   |
| Østfold Hospital Trust, Moss <sup>a</sup>                    | 8                                              | 7                                   |
| Nordland Hospital Trust, Bodø <sup>a</sup>                   | 9                                              | 6                                   |
| The University Hospital of North Norway, Tromsø <sup>a</sup> | 5                                              | 6                                   |
| Vestfold Hospital Trust, Tønsberg <sup>b</sup>               | 6                                              | 4                                   |
| Oslo University Hospital <sup>c</sup>                        | 6                                              | 4                                   |
| Lillehammer Hospital for Rheumatic Diseases <sup>a</sup>     | 2                                              | 7                                   |
| Hospital of Southern Norway Trust, Kristiansand <sup>a</sup> | 5                                              | 4                                   |
| Haugesund Hospital for Rheumatic Diseases <sup>a</sup>       | 5                                              | 4                                   |
| Fonna Hospital Trust, Haugesund <sup>b</sup>                 | 3                                              | 5                                   |
| Vestre Viken Hospital Trust, Drammen <sup>a</sup>            | 5                                              | 3                                   |
| Trondheim University Hospital <sup>c</sup>                   | 3                                              | 4                                   |
| Innlandet Hospital Trust, Elverum <sup>b</sup>               | 4                                              | 1                                   |
| Haukeland University Hospital, Bergen <sup>c</sup>           | 4                                              | 1                                   |
| Innlandet Hospital Trust, Hamar <sup>b</sup>                 | 1                                              | 3                                   |
| Førde Hospital Trust, Førde <sup>a</sup>                     | 2                                              | 1                                   |

Data are No.  
<sup>a</sup> Department of Rheumatology, <sup>b</sup> Department of Gastroenterology, <sup>c</sup> Department of Dermatology

## eTable 2. Changes in Medication During the Trial

| <b>eTable 2a. Medication following infliximab discontinuation</b> |                                             |                                 |
|-------------------------------------------------------------------|---------------------------------------------|---------------------------------|
|                                                                   | <b>Therapeutic drug monitoring<br/>N=59</b> | <b>Standard dosing<br/>N=44</b> |
| No new medication added                                           | 17                                          | 23                              |
| Etanercept                                                        | 12                                          | 8                               |
| Secukinumab                                                       | 5                                           | 4                               |
| Vedolizumab                                                       | 3                                           | 5                               |
| Methotrexate                                                      | 4                                           | 2                               |
| Tofacitinib                                                       | 4                                           | 1                               |
| Adalimumab                                                        | 5                                           | 0                               |
| Abatacept                                                         | 3                                           | 0                               |
| Glucocorticoids                                                   | 4                                           | 0                               |
| Baricitinib                                                       | 1                                           | 0                               |
| Golimumab                                                         | 0                                           | 1                               |
| Ustekinumab                                                       | 1                                           | 0                               |
| Data are No.                                                      |                                             |                                 |

| <b>eTable 2b. Immunosuppressive comedication at baseline and at Week 30</b> |                                    |                        |
|-----------------------------------------------------------------------------|------------------------------------|------------------------|
|                                                                             | <b>Therapeutic drug monitoring</b> | <b>Standard dosing</b> |
| Any comedication at baseline                                                | 109/200 (55)                       | 112/198 (57)           |
| Any comedication at Week 30                                                 | 86/157 (55)                        | 90/140 (64)            |
| Methotrexate at baseline                                                    | 78/200 (39)                        | 72/198 (36)            |
| Methotrexate at Week 30                                                     | 60/157 (38)                        | 51/140 (36)            |
| Azathioprine at baseline                                                    | 26/200 (13)                        | 28/198 (14)            |
| Azathioprine at Week 30                                                     | 25/157 (16)                        | 31/140 (22)            |
| Data are No. (%)                                                            |                                    |                        |

**eTable 3. Details of Study Endpoints**

| Endpoint                                          | Abbreviation | Diagnosis | Description                                                                                                                                                                                                                                                                                                                                                                                                 |
|---------------------------------------------------|--------------|-----------|-------------------------------------------------------------------------------------------------------------------------------------------------------------------------------------------------------------------------------------------------------------------------------------------------------------------------------------------------------------------------------------------------------------|
| <b>Primary endpoint</b>                           |              |           |                                                                                                                                                                                                                                                                                                                                                                                                             |
| Clinical remission                                |              | All       | Clinical remission is defined according to the patient's diagnosis (see below).                                                                                                                                                                                                                                                                                                                             |
|                                                   |              | RA        | Clinical remission in Rheumatoid Arthritis is defined as Disease Activity Score of 28 joints <2.6. Separately, this endpoint is pre-specified as a secondary endpoint. More details are given below.                                                                                                                                                                                                        |
|                                                   |              | SpA       | Clinical remission in Spondyloarthritis is defined as Ankylosing Spondylitis Disease Activity Score <1.3. Separately, this endpoint is pre-specified as a secondary endpoint. More details are given below.                                                                                                                                                                                                 |
|                                                   |              | PsA       | Clinical remission in Psoriatic Arthritis is defined as Disease Activity Score of 28 joints <2.6. Separately, this endpoint is pre-specified as a secondary endpoint. More details are given below.                                                                                                                                                                                                         |
|                                                   |              | UC        | Clinical remission in Ulcerative Colitis is defined as a Partial Mayo score ≤2 with no sub-scores >1. Separately, this endpoint is pre-specified as a secondary endpoint. More details are given below.                                                                                                                                                                                                     |
|                                                   |              | CD        | Clinical remission in Cohn's Disease is defined as Harvey-Bradshaw Index ≤4. Separately, this endpoint is pre-specified as a secondary endpoint. More details are given below.                                                                                                                                                                                                                              |
|                                                   |              | Ps        | Clinical remission in psoriasis is defined as Psoriasis Area and Severity Index ≤ 4. Separately, this endpoint is pre-specified as a secondary endpoint. More details are given below.                                                                                                                                                                                                                      |
| <b>Secondary efficacy endpoints</b>               |              |           |                                                                                                                                                                                                                                                                                                                                                                                                             |
| <b>Common disease activity endpoints</b>          |              |           |                                                                                                                                                                                                                                                                                                                                                                                                             |
| Physician's global assessment of disease activity | PhGA         | All       | Physicians global assessment of disease activity Range 0-100 on a visual analogue scale (VAS). 0 indicates no activity, 100 highest possible disease activity.                                                                                                                                                                                                                                              |
| Patient's global assessment of disease activity   | PGA          | All       | Patients assessment of disease activity range 0-100 on a visual analogue scale (VAS). Patients are asked to rate their disease activity according to the following question: "We ask you to assess how active your (disease) has been during the last week. Considering all your symptoms, please mark a vertical line on the scale below." 0 indicates no activity, 100 highest possible disease activity. |
| Erythrocyte sedimentation rate                    | ESR          | All       | Measured in mm/h, assessed by the Westergren method. Range 1-130 mm/h. Normal range 1-12 mm/h (men) and 1-17 mm/h (female).                                                                                                                                                                                                                                                                                 |
| C-reactive protein                                | CRP          | All       | Measured in mg/L. Normal range 0-4 mg/L.                                                                                                                                                                                                                                                                                                                                                                    |

| Endpoint                                                            | Abbreviation | Diagnosis        | Description                                                                                                                                                                                                                                                                                                                                                                                                                                                                                                                                                                                                                                                                                                                                                                                                                                        |
|---------------------------------------------------------------------|--------------|------------------|----------------------------------------------------------------------------------------------------------------------------------------------------------------------------------------------------------------------------------------------------------------------------------------------------------------------------------------------------------------------------------------------------------------------------------------------------------------------------------------------------------------------------------------------------------------------------------------------------------------------------------------------------------------------------------------------------------------------------------------------------------------------------------------------------------------------------------------------------|
| <b>Disease specific disease activity endpoints</b>                  |              |                  |                                                                                                                                                                                                                                                                                                                                                                                                                                                                                                                                                                                                                                                                                                                                                                                                                                                    |
| Disease Activity Score 28 joints <sup>1</sup>                       | DAS28        | RA<br>PsA        | Disease activity score 28 joints includes the 28 tender and swollen joint count (SJC28 and TJC28), ESR and PGA. The DAS28 is calculated as follows:<br>$DAS28 = 0.56 \cdot \sqrt{TJC28} + 0.28 \cdot \sqrt{SJC28} + 0.70 \cdot \ln(ESR) + 0.014 \cdot PGA$ . Range 0-9.4. Higher values indicate worse disease; DAS28 < 2.6 remission, 2.6-<3.2 low disease activity, 3.2-5.1 moderate, >5.1 high disease activity. MCID 1.2. <sup>2</sup> DAS28 is a recommended tool to be used for assessment of RA disease activity in clinical trials based on both psychometric properties and feasibility. <sup>2</sup>                                                                                                                                                                                                                                     |
| Simple Disease Activity Index <sup>3</sup>                          | SDAI         | RA<br>PsA        | The SDAI includes 28 tender and swollen joint count (SJC28 and TJC28), PGA, PhGA and CRP. The SDAI is calculated as follows: $SDAI = TJC28 + SJC28 + PGA/10 + PhGA/10 + CRP/10$ . Range 0-86. Higher values indicate worse disease. Remission <3.3, high disease activity >26. MCID 13. <sup>2</sup>                                                                                                                                                                                                                                                                                                                                                                                                                                                                                                                                               |
| Modified Health Assessment Questionnaire <sup>4</sup>               | MHAQ         | SpA<br>RA<br>PsA | The MHAQ consists of 8 questions evaluating the patient's physical function. Each item is scored on a categorical 0-3 scale and the sum score is divided by 8 to form the MHAQ score ranging 0.0 to 3.0. Higher values indicate worse physical function.                                                                                                                                                                                                                                                                                                                                                                                                                                                                                                                                                                                           |
| Disease Activity in Psoriatic Arthritis <sup>5</sup>                | DAPSA        | PsA              | Disease Activity index for Psoriatic Arthritis (DAPSA) includes SDAI includes 68 tender and 66 swollen joint count, CRP, PGA and VAS Pain and is calculated as follows: $TJC68 + SJC66 + CRP (mg/L)/10 + PGA (0-100)/10 + VAS Pain (0-100)/10$ . Range 0 and higher (depending on the CRP). Higher score indicates worse disease.                                                                                                                                                                                                                                                                                                                                                                                                                                                                                                                  |
| Ankylosing Spondylitis Disease Activity Score <sup>6</sup>          | ASDAS        | SpA              | Ankylosing Spondylitis Disease Activity Score includes components from the BASDAI, PGA and CRP: total back pain (VAS 0-100), PGA (VAS 0-100), peripheral pain/swelling (Numeric rating scale (NRS) 0-10), duration of morning stiffness (NRS 0-10) and CRP in mg/L. ASDAS is calculated as follows:<br>$ASDAS-CRP = 0.121 \cdot \text{total back pain} + 0.0110 \cdot \text{patient global} + 0.073 \cdot \text{peripheral pain/swelling} + 0.058 \cdot \text{duration of morning stiffness} + 0.579 \cdot \ln(CRP+1)$ . Range 0.6-7.7. Higher values indicate worse disease. Remission (inactive disease) <1.3. Minimal clinically important improvement 1.1. <sup>7</sup> ASDAS is the recommended tool to be used for assessment of SpA disease activity in clinical trials based on both psychometric properties and feasibility. <sup>8</sup> |
| The Bath Ankylosing Spondylitis Disease Activity Index <sup>9</sup> | BASDAI       | SpA              | BASDAI includes six questions pertaining to the five major symptoms of ankylosing spondylitis: fatigue, spinal pain, joint pain/swelling, areas of localized tenderness, morning stiffness duration and morning stiffness severity. Each question is scored on a NRS (0-10). The two morning stiffness scores are averaged and added to the average of the other scores forming a total score in the range of 0-10 with larger values indicating worse disease. Components of BASDAI is included in ASDAS.                                                                                                                                                                                                                                                                                                                                         |
| Partial Mayo Score <sup>10</sup>                                    | PMS          | UC               | Partial Mayo Score consists of three components (rectal bleeding, stool frequency and physician rating of disease activity) rated from 0–3 that are summed to give a total score that ranges from 0–3. Range 0-9. Higher score indicates worse disease. Clinical remission ≤2 points. The non-invasive partial Mayo score is derived from the Mayo score (Range 0-12). <sup>11</sup> The partial Mayo score is more feasible as it does not require endoscopy and has been shown to perform as well as the full Mayo score to identify patient-perceived response in clinical trials. <sup>10</sup>                                                                                                                                                                                                                                                |

| Endpoint                                              | Abbreviation | Diagnosis | Description                                                                                                                                                                                                                                                                                                                                                                                                                                                                                                                                                                                                                                                                                                                                                                                                                                                                                                                                                                                                                                                                                                                                                                            |
|-------------------------------------------------------|--------------|-----------|----------------------------------------------------------------------------------------------------------------------------------------------------------------------------------------------------------------------------------------------------------------------------------------------------------------------------------------------------------------------------------------------------------------------------------------------------------------------------------------------------------------------------------------------------------------------------------------------------------------------------------------------------------------------------------------------------------------------------------------------------------------------------------------------------------------------------------------------------------------------------------------------------------------------------------------------------------------------------------------------------------------------------------------------------------------------------------------------------------------------------------------------------------------------------------------|
| Harvey-Bradshaw Index <sup>12</sup>                   | HBI          | CD        | Harvey-Bradshaw Index consists of five domains; general well-being (0-4), abdominal pain (0-3), number of liquid soft stools per day, abdominal mass (0-3) and number of predefined complications. The scores of each sub-domain are summed up to compute the HBI. The range of HBI score is from 0 with no upper limit. Higher values indicate worse disease. The HBI score of $\leq 4$ points is well established as clinical remission and a change of HBI score of $\geq 3$ points is considered as a significant improvement in clinical trials assessing efficacy of medical therapy. <sup>13</sup> There are two validated, clinical activity indices for Crohn's disease, Crohn's disease activity index (CDAI) <sup>14</sup> and Harvey Bradshaw index. <sup>12</sup> These two indices are highly correlated. <sup>13</sup> Harvey Bradshaw index is often preferred to CDAI for assessment of CD disease activity in clinical trials due to feasibility (no need for diary card).                                                                                                                                                                                           |
| Calprotectin                                          |              | UC<br>CD  | Fecal calprotectin is measured in mg/kg. Fecal calprotectin is a marker of inflammation in the gut and widely used to monitor disease activity in inflammatory bowel disease. <sup>15</sup> The measurement range for fecal calprotectin is from $< 50$ mg/kg to $> 2000$ mg/kg. Validated cut-off values are still lacking. <sup>16</sup>                                                                                                                                                                                                                                                                                                                                                                                                                                                                                                                                                                                                                                                                                                                                                                                                                                             |
| Psoriasis Area and Severity Index <sup>17</sup>       | PASI         | Ps        | The Psoriasis Area and Severity Index is a measure of redness, thickness and scaliness of lesions (each graded 0-4), weighted by the area and location of involvement*. It scores from 0 (no disease) to 72 (maximal disease severity). The PASI score is the current "gold standard" for assessment of Ps disease activity in clinical trials. <sup>18</sup><br>* The head, upper extremities, lower extremities, and trunk are assessed separately and then combined using weighting based on the surface area represented by each area (head = 0.1, upper extremities = 0.2, trunk = 0.3, and lower extremities = 0.4). The degree of erythema, induration, and scale in each area is judged on a 0-4 scale, the sum of which represents disease severity. The area of involvement of each area is graded from 0-6, depending on the estimated percentage of lesional area (0 = 0%, 1 = $<10\%$ , 2 = 10-29%, 3 = 30-49%, 4 = 50-69%, 5 = 70-89%, and 6 = 90-100%). These body scores are multiplied by the disease severity score and the weighting for each body area, yielding a score between 0 and 72. In trials, PASI calculators are supplied to facilitate ease of scoring. |
| <b>Quality of life and utility endpoints</b>          |              |           |                                                                                                                                                                                                                                                                                                                                                                                                                                                                                                                                                                                                                                                                                                                                                                                                                                                                                                                                                                                                                                                                                                                                                                                        |
| SF-36 physical functioning <sup>19</sup>              | SF36 PF      | All       | The RAND 36-item Short Form Health survey consists of 36 questions. The 36 questions are combined into eight domains by computing the raw scores, normalizing to the Norwegian general population mean and standard deviation and then multiplying 10 and adding 50 to form the domain t-score. This enables assessing the study t-score results with a general Norwegian population with a t-score of 50 and standard deviation of 10. Higher values indicate better quality-of-life.                                                                                                                                                                                                                                                                                                                                                                                                                                                                                                                                                                                                                                                                                                 |
| SF-36 role limitation due to physical health problems | SF36 RP      | All       | See above.                                                                                                                                                                                                                                                                                                                                                                                                                                                                                                                                                                                                                                                                                                                                                                                                                                                                                                                                                                                                                                                                                                                                                                             |

| Endpoint                                                                 | Abbreviation     | Diagnosis | Description                                                                                                                                                                                                                                                                                                                                                                                                                     |
|--------------------------------------------------------------------------|------------------|-----------|---------------------------------------------------------------------------------------------------------------------------------------------------------------------------------------------------------------------------------------------------------------------------------------------------------------------------------------------------------------------------------------------------------------------------------|
| SF-36 bodily pain                                                        | SF36 BP          | All       | See above.                                                                                                                                                                                                                                                                                                                                                                                                                      |
| SF-36 general health                                                     | SF36 GH          | All       | See above.                                                                                                                                                                                                                                                                                                                                                                                                                      |
| SF-36 emotional well-being                                               | SF36 EM          | All       | See above.                                                                                                                                                                                                                                                                                                                                                                                                                      |
| SF-36 role limitations due to personal or emotional problems             | SF36 RE          | All       | See above.                                                                                                                                                                                                                                                                                                                                                                                                                      |
| SF-36 social functioning                                                 | SF36 SF          | All       | See above.                                                                                                                                                                                                                                                                                                                                                                                                                      |
| SF-36 energy/fatigue                                                     | SF36 EN          | All       | See above.                                                                                                                                                                                                                                                                                                                                                                                                                      |
| SF-36 physical component summary score                                   | SF36 PCS         | All       | The SF-36 physical component summary score is a weighted sum of the domain normalized scores using Norwegian specific weights. Higher values indicate better quality-of-life.                                                                                                                                                                                                                                                   |
| SF-36 mental component summary score                                     | SF36 MCS         | All       | See above                                                                                                                                                                                                                                                                                                                                                                                                                       |
| EQ5D VAS <sup>20</sup>                                                   | EQ5D VAS         | All       | European Quality of life five dimensions visual analogue scale. The EQ VAS records the patient's self-rated health on a vertical visual analogue scale, where the endpoints are labelled 'The best health you can imagine' and 'The worst health you can imagine'. The VAS can be used as a quantitative measure of health outcome that reflect the patient's own judgement. 0 indicates no activity, 100 very severe activity. |
| EQ5D index (UK weighted) <sup>20</sup>                                   | EQ-5D            | All       | European Quality of life five dimensions EQ-5D is a standardized instrument for use as a measure of health outcome. The EQ-5D index values are calculated according to the EQ-5D United Kingdom Time Trade-Off (TTO) value set.                                                                                                                                                                                                 |
| Work Productivity and Impairment Questionnaire Absenteeism <sup>21</sup> | WPAI absenteeism | All       | WPAI absenteeism is the percent work time missed due to specified problem.                                                                                                                                                                                                                                                                                                                                                      |
| Work Productivity and Impairment Questionnaire Presentism <sup>21</sup>  | WPAI presentism  | All       | WPAI presentism is the percent impairment while working due to specified problem.                                                                                                                                                                                                                                                                                                                                               |



| Endpoint                                                                             | Abbreviation | Diagnosis        | Description                                                                                                                                                                                                                                                                                                                                                                                                                                                                                                                                                                |
|--------------------------------------------------------------------------------------|--------------|------------------|----------------------------------------------------------------------------------------------------------------------------------------------------------------------------------------------------------------------------------------------------------------------------------------------------------------------------------------------------------------------------------------------------------------------------------------------------------------------------------------------------------------------------------------------------------------------------|
| Work Productivity and Impairment Questionnaire overall work impairment <sup>21</sup> | WPAI WI      | All              | WPAI overall work impairment is the percent overall work impairment due to specified problem.                                                                                                                                                                                                                                                                                                                                                                                                                                                                              |
| Work Productivity and Impairment Questionnaire activity impairment <sup>21</sup>     | WPAI AI      | All              | WPAI activity impairment is the percent activity impairment due to specified problem.                                                                                                                                                                                                                                                                                                                                                                                                                                                                                      |
| Pain                                                                                 |              | RA<br>PsA<br>SpA | Range 0-100 on a visual analogue scale (VAS). 0 indicates no pain, 100 very severe pain.                                                                                                                                                                                                                                                                                                                                                                                                                                                                                   |
| Fatigue                                                                              |              | RA<br>PsA<br>SpA | Range 0-100 on a visual analogue scale (VAS). 0 indicates no fatigue, 100 very severe fatigue.                                                                                                                                                                                                                                                                                                                                                                                                                                                                             |
| Rheumatoid Arthritis Impact of Disease total score <sup>22</sup>                     | RAID total   | RA               | The Rheumatoid Arthritis Impact of Disease (RAID) score is calculated based on seven questions (pain, function, fatigue, sleep, emotional wellbeing, physical wellbeing and coping/self-efficacy), each scored 0-10 on a Numeric rating scale (NRS). The RAID total score is calculated as follows: RAID final value = 0.21*pain* 0.21 + 0.16*function + 0.15*fatigue + 0.12*physical wellbeing + 0.12*sleep + 0.12*emotional wellbeing + 0.12*coping. The range of the RAID total score is 0–10 where higher values indicate worse status.                                |
| Psoriatic Arthritis Impact of Disease total score <sup>23</sup>                      | PsAID        | PsA              | The PsAID questionnaire with 9 domains of health (PsAID-9) was developed by EULAR to calculate a score for clinical trials reflecting the impact of PsA from the patient’s perspective. The nine domains with relative weights are: pain (0.174), fatigue (0.131), skin (0.121), work and/or leisure activities (0.110), function (0.107), discomfort (0.098), sleep (0.089), coping (0.087) and anxiety (0.085), each rated on an NRS (0-10). The rates of each domain are weighted and summed to form a score in the range of 0-10. Higher score indicates worse status. |
| Inflammatory Bowel Disease Questionnaire total score <sup>24</sup>                   | IBDQ         | CD<br>UC         | The IBDQ is a tool to measure health-related quality of life in patients with inflammatory bowel diseases. The questionnaire consists of 32 questions scored in four domains: bowel symptoms, emotional health, systemic systems and social function. The response for each question ranges from one to seven with one corresponding to significant impairment and seven corresponding to no impairment. The total IBDQ score is the sum of all the question scores, ranging 32 to 224. Higher values indicate better quality-of-life.                                     |

| Endpoint                                                                                     | Abbreviation        | Diagnosis | Description                                                                                                                                                                                                                                                                                                                                                                                                                                                                                                                                                                                                                                                                                       |                             |                              |                           |
|----------------------------------------------------------------------------------------------|---------------------|-----------|---------------------------------------------------------------------------------------------------------------------------------------------------------------------------------------------------------------------------------------------------------------------------------------------------------------------------------------------------------------------------------------------------------------------------------------------------------------------------------------------------------------------------------------------------------------------------------------------------------------------------------------------------------------------------------------------------|-----------------------------|------------------------------|---------------------------|
| Dermatology Life Quality Index total score <sup>25</sup>                                     | DLQI                | PS        | The Dermatology Life Quality Index (DLQI) consists of 10 questions concerning patients' perception of the impact of skin diseases on their health-related quality of life over the last week. It has been validated for adult dermatology patients aged 16 years and older. The items of the DLQI encompass aspects of symptoms and feelings, daily activities, leisure, work/ school, personal relationships and side effects of treatment. Each question is scored on a 4-point Likert scale: Not at all/Not relevant=0, A little=1, A lot=2 and Very much=3. Scores of individual items (0-3) are added to yield a total score (0-30); higher scores mean greater impairment of patient's QoL. |                             |                              |                           |
| European League Against Rheumatism response <sup>2</sup>                                     | EULAR response      | RA        | Change from baseline                                                                                                                                                                                                                                                                                                                                                                                                                                                                                                                                                                                                                                                                              |                             |                              |                           |
|                                                                                              |                     |           | DAS28 at time-point                                                                                                                                                                                                                                                                                                                                                                                                                                                                                                                                                                                                                                                                               | $\Delta$ DAS28 $\leq$ - 1.2 | -1.2 < $\Delta$ DAS28 < -0.6 | $\Delta$ DAS28 $\geq$ 0.6 |
|                                                                                              |                     |           | DAS28 $\leq$ 3.2                                                                                                                                                                                                                                                                                                                                                                                                                                                                                                                                                                                                                                                                                  | Good                        | Moderate                     | None                      |
|                                                                                              |                     |           | 3.2 < DAS28 $\leq$ 5.1                                                                                                                                                                                                                                                                                                                                                                                                                                                                                                                                                                                                                                                                            | Moderate                    | Moderate                     | None                      |
|                                                                                              |                     |           | DAS28 > 5.1                                                                                                                                                                                                                                                                                                                                                                                                                                                                                                                                                                                                                                                                                       | Moderate                    | None                         | None                      |
| American College of Rheumatology / European League Against Rheumatism remission <sup>2</sup> | ACR/EULAR remission | RA        | To be in ACR/EULAR remission, the patient must satisfy all of the following: TJC28 $\leq$ 1, SJC28 $\leq$ 1, CRP $\leq$ 10 (mg/l), PGA $\leq$ 14.                                                                                                                                                                                                                                                                                                                                                                                                                                                                                                                                                 |                             |                              |                           |
| American College of Rheumatology response                                                    | ACR20, ACR50, ACR70 | RA        | An ACR20 response is defined if the following criteria are fulfilled: 20% improvement in tender joint count 28, 20% improvement in swollen joint count 28, and 20% improvement in at least 3 of 5 other core set items (Investigator global assessment of disease activity, patient global assessment of disease activity, patient pain, disability, ESR/CRP. ACR50 and ACR70 are defined in a similar manner with 50% and 70% improvement, respectively. <sup>26</sup>                                                                                                                                                                                                                           |                             |                              |                           |

**eTable 4. Prespecified Secondary Outcomes**

|                                                                                                                                                                                                                                                                                                                                                                                                                                                                                                                                                                                                                                                                                                                                                                                                                                                                                                                                                                                                                                                                                                                                                                                                                                                                                                                      |
|----------------------------------------------------------------------------------------------------------------------------------------------------------------------------------------------------------------------------------------------------------------------------------------------------------------------------------------------------------------------------------------------------------------------------------------------------------------------------------------------------------------------------------------------------------------------------------------------------------------------------------------------------------------------------------------------------------------------------------------------------------------------------------------------------------------------------------------------------------------------------------------------------------------------------------------------------------------------------------------------------------------------------------------------------------------------------------------------------------------------------------------------------------------------------------------------------------------------------------------------------------------------------------------------------------------------|
| <b>Continous variables</b>                                                                                                                                                                                                                                                                                                                                                                                                                                                                                                                                                                                                                                                                                                                                                                                                                                                                                                                                                                                                                                                                                                                                                                                                                                                                                           |
| Change baseline week 30                                                                                                                                                                                                                                                                                                                                                                                                                                                                                                                                                                                                                                                                                                                                                                                                                                                                                                                                                                                                                                                                                                                                                                                                                                                                                              |
| Physician's global assessment of disease activity, visual analogue scale (VAS)                                                                                                                                                                                                                                                                                                                                                                                                                                                                                                                                                                                                                                                                                                                                                                                                                                                                                                                                                                                                                                                                                                                                                                                                                                       |
| Patient's global assessment of disease activity (VAS)                                                                                                                                                                                                                                                                                                                                                                                                                                                                                                                                                                                                                                                                                                                                                                                                                                                                                                                                                                                                                                                                                                                                                                                                                                                                |
| Erythrocyte sedimentation rate, mm/h                                                                                                                                                                                                                                                                                                                                                                                                                                                                                                                                                                                                                                                                                                                                                                                                                                                                                                                                                                                                                                                                                                                                                                                                                                                                                 |
| C-reactive protein, mg/L                                                                                                                                                                                                                                                                                                                                                                                                                                                                                                                                                                                                                                                                                                                                                                                                                                                                                                                                                                                                                                                                                                                                                                                                                                                                                             |
| Disease Activity Score 28 joints (DAS28) <sup>RA/PsA</sup>                                                                                                                                                                                                                                                                                                                                                                                                                                                                                                                                                                                                                                                                                                                                                                                                                                                                                                                                                                                                                                                                                                                                                                                                                                                           |
| Simple Disease Activity Index (SDAI) <sup>RA/PsA</sup>                                                                                                                                                                                                                                                                                                                                                                                                                                                                                                                                                                                                                                                                                                                                                                                                                                                                                                                                                                                                                                                                                                                                                                                                                                                               |
| Modified Health Assessment Questionnaire (MHAQ) <sup>RA/PsA/SpA</sup>                                                                                                                                                                                                                                                                                                                                                                                                                                                                                                                                                                                                                                                                                                                                                                                                                                                                                                                                                                                                                                                                                                                                                                                                                                                |
| Disease Activity in Psoriatic Arthritis (DAPSA) <sup>PsA</sup>                                                                                                                                                                                                                                                                                                                                                                                                                                                                                                                                                                                                                                                                                                                                                                                                                                                                                                                                                                                                                                                                                                                                                                                                                                                       |
| Bath Ankylosing Spondylitis Disease Activity Index (BASDAI) <sup>SpA</sup>                                                                                                                                                                                                                                                                                                                                                                                                                                                                                                                                                                                                                                                                                                                                                                                                                                                                                                                                                                                                                                                                                                                                                                                                                                           |
| Ankylosing Spondylitis Disease Activity Score (ASDAS) <sup>SpA</sup>                                                                                                                                                                                                                                                                                                                                                                                                                                                                                                                                                                                                                                                                                                                                                                                                                                                                                                                                                                                                                                                                                                                                                                                                                                                 |
| Partial Mayo Score (PMS) <sup>UC</sup>                                                                                                                                                                                                                                                                                                                                                                                                                                                                                                                                                                                                                                                                                                                                                                                                                                                                                                                                                                                                                                                                                                                                                                                                                                                                               |
| Harvey-Bradshaw Index (HBI) <sup>CD</sup>                                                                                                                                                                                                                                                                                                                                                                                                                                                                                                                                                                                                                                                                                                                                                                                                                                                                                                                                                                                                                                                                                                                                                                                                                                                                            |
| Calprotectin, mg/kg <sup>CD, UC</sup>                                                                                                                                                                                                                                                                                                                                                                                                                                                                                                                                                                                                                                                                                                                                                                                                                                                                                                                                                                                                                                                                                                                                                                                                                                                                                |
| Psoriasis Area and Severity Index (PASI) <sup>Ps</sup>                                                                                                                                                                                                                                                                                                                                                                                                                                                                                                                                                                                                                                                                                                                                                                                                                                                                                                                                                                                                                                                                                                                                                                                                                                                               |
| <b>State variables</b>                                                                                                                                                                                                                                                                                                                                                                                                                                                                                                                                                                                                                                                                                                                                                                                                                                                                                                                                                                                                                                                                                                                                                                                                                                                                                               |
| Week 14/ Week 30                                                                                                                                                                                                                                                                                                                                                                                                                                                                                                                                                                                                                                                                                                                                                                                                                                                                                                                                                                                                                                                                                                                                                                                                                                                                                                     |
| Remission at week 14 <sup>All disease groups</sup>                                                                                                                                                                                                                                                                                                                                                                                                                                                                                                                                                                                                                                                                                                                                                                                                                                                                                                                                                                                                                                                                                                                                                                                                                                                                   |
| Improvement at week 14 <sup>a All disease groups</sup>                                                                                                                                                                                                                                                                                                                                                                                                                                                                                                                                                                                                                                                                                                                                                                                                                                                                                                                                                                                                                                                                                                                                                                                                                                                               |
| DAS28 remission week 30 <sup>RA/PsA</sup>                                                                                                                                                                                                                                                                                                                                                                                                                                                                                                                                                                                                                                                                                                                                                                                                                                                                                                                                                                                                                                                                                                                                                                                                                                                                            |
| SDAI remission week 30 <sup>RA/PsA</sup>                                                                                                                                                                                                                                                                                                                                                                                                                                                                                                                                                                                                                                                                                                                                                                                                                                                                                                                                                                                                                                                                                                                                                                                                                                                                             |
| American College of Rheumatology / European League Against Rheumatism remission (ACR/EULAR remission) <sup>RA</sup>                                                                                                                                                                                                                                                                                                                                                                                                                                                                                                                                                                                                                                                                                                                                                                                                                                                                                                                                                                                                                                                                                                                                                                                                  |
| European League Against Rheumatism (EULAR) response <sup>RA</sup> week 30                                                                                                                                                                                                                                                                                                                                                                                                                                                                                                                                                                                                                                                                                                                                                                                                                                                                                                                                                                                                                                                                                                                                                                                                                                            |
| American College of Rheumatology response 20%, 50%, 70% (ACR 20/50/70) <sup>RA</sup>                                                                                                                                                                                                                                                                                                                                                                                                                                                                                                                                                                                                                                                                                                                                                                                                                                                                                                                                                                                                                                                                                                                                                                                                                                 |
| ASDAS remission week 30 <sup>SpA</sup>                                                                                                                                                                                                                                                                                                                                                                                                                                                                                                                                                                                                                                                                                                                                                                                                                                                                                                                                                                                                                                                                                                                                                                                                                                                                               |
| PMS remission week 30 <sup>UC</sup>                                                                                                                                                                                                                                                                                                                                                                                                                                                                                                                                                                                                                                                                                                                                                                                                                                                                                                                                                                                                                                                                                                                                                                                                                                                                                  |
| HBI remission week 30 <sup>CD</sup>                                                                                                                                                                                                                                                                                                                                                                                                                                                                                                                                                                                                                                                                                                                                                                                                                                                                                                                                                                                                                                                                                                                                                                                                                                                                                  |
| PASI remission week 30 <sup>Ps</sup>                                                                                                                                                                                                                                                                                                                                                                                                                                                                                                                                                                                                                                                                                                                                                                                                                                                                                                                                                                                                                                                                                                                                                                                                                                                                                 |
| PASI mild to moderate disease week 30 <sup>Ps</sup>                                                                                                                                                                                                                                                                                                                                                                                                                                                                                                                                                                                                                                                                                                                                                                                                                                                                                                                                                                                                                                                                                                                                                                                                                                                                  |
| PASI complete clearance week 30 <sup>Ps</sup>                                                                                                                                                                                                                                                                                                                                                                                                                                                                                                                                                                                                                                                                                                                                                                                                                                                                                                                                                                                                                                                                                                                                                                                                                                                                        |
|                                                                                                                                                                                                                                                                                                                                                                                                                                                                                                                                                                                                                                                                                                                                                                                                                                                                                                                                                                                                                                                                                                                                                                                                                                                                                                                      |
| Time to remission <sup>All disease groups</sup>                                                                                                                                                                                                                                                                                                                                                                                                                                                                                                                                                                                                                                                                                                                                                                                                                                                                                                                                                                                                                                                                                                                                                                                                                                                                      |
| Time to sustained remission <sup>All disease groups</sup>                                                                                                                                                                                                                                                                                                                                                                                                                                                                                                                                                                                                                                                                                                                                                                                                                                                                                                                                                                                                                                                                                                                                                                                                                                                            |
|                                                                                                                                                                                                                                                                                                                                                                                                                                                                                                                                                                                                                                                                                                                                                                                                                                                                                                                                                                                                                                                                                                                                                                                                                                                                                                                      |
| <b>Quality of life and utility</b>                                                                                                                                                                                                                                                                                                                                                                                                                                                                                                                                                                                                                                                                                                                                                                                                                                                                                                                                                                                                                                                                                                                                                                                                                                                                                   |
| 36-item Short Form Health survey (SF 36) <sup>All disease groups</sup>                                                                                                                                                                                                                                                                                                                                                                                                                                                                                                                                                                                                                                                                                                                                                                                                                                                                                                                                                                                                                                                                                                                                                                                                                                               |
| Work Productivity and Impairment Questionnaire (WPAI) <sup>All disease groups</sup>                                                                                                                                                                                                                                                                                                                                                                                                                                                                                                                                                                                                                                                                                                                                                                                                                                                                                                                                                                                                                                                                                                                                                                                                                                  |
| European Quality of life five dimensions (EQ5D) <sup>All disease groups</sup>                                                                                                                                                                                                                                                                                                                                                                                                                                                                                                                                                                                                                                                                                                                                                                                                                                                                                                                                                                                                                                                                                                                                                                                                                                        |
| Pain VAS <sup>RA/PsA/SpA</sup>                                                                                                                                                                                                                                                                                                                                                                                                                                                                                                                                                                                                                                                                                                                                                                                                                                                                                                                                                                                                                                                                                                                                                                                                                                                                                       |
| Fatigue VAS <sup>RA/PsA/SpA</sup>                                                                                                                                                                                                                                                                                                                                                                                                                                                                                                                                                                                                                                                                                                                                                                                                                                                                                                                                                                                                                                                                                                                                                                                                                                                                                    |
| Rheumatoid Arthritis Impact of Disease total score RAID Total score <sup>RA</sup>                                                                                                                                                                                                                                                                                                                                                                                                                                                                                                                                                                                                                                                                                                                                                                                                                                                                                                                                                                                                                                                                                                                                                                                                                                    |
| Psoriatic Arthritis Impact of Disease (PsAID) <sup>PsA</sup>                                                                                                                                                                                                                                                                                                                                                                                                                                                                                                                                                                                                                                                                                                                                                                                                                                                                                                                                                                                                                                                                                                                                                                                                                                                         |
| Inflammatory Bowel Disease Questionnaire (IBDQ) <sup>CD/UC</sup>                                                                                                                                                                                                                                                                                                                                                                                                                                                                                                                                                                                                                                                                                                                                                                                                                                                                                                                                                                                                                                                                                                                                                                                                                                                     |
| Dermatology Life Quality Index total score (DLQI) <sup>Ps</sup>                                                                                                                                                                                                                                                                                                                                                                                                                                                                                                                                                                                                                                                                                                                                                                                                                                                                                                                                                                                                                                                                                                                                                                                                                                                      |
| <sup>a</sup> Improvement defined as; RA and PsA, a decrease in DAS28 of $\geq 1.2$ from baseline; SpA, a decrease in ASDAS of $\geq 1.1$ from baseline; UC, a decrease in the partial Mayo score of $\geq 3$ points from baseline or a partial Mayo score of 0; CD a decrease in HBI of $\geq 4$ points from baseline; Ps, a PASI 50 (A 50% decrease in the PASI obtained at baseline)<br>Abbreviations: DAS28, Disease Activity Score in 28 joints with ESR; SDAI, Simplified Disease Activity Index; MHAQ, Modified Health Assessment Questionnaire; DAPSA, Disease Activity in Psoriatic Arthritis; BASDAI, Bath Ankylosing Spondylitis Disease Activity Index; ASDAS, Ankylosing Spondylitis Disease Activity Score; PMS, Partial Mayo Score; HBI, Harvey-Bradshaw Index; PASI, Psoriasis Area and Severity Index; SF-36, RAND Short Form Health Survey t-scores using Norwegian norms; EQ-5D, EuroQol questionnaire time trade-off United Kingdom weighted; VAS, visual analogue scale; WPAI, Work Productivity And Impairment questionnaire; RAID, Rheumatoid Arthritis Impact of Disease; PsAID, Psoriatic Arthritis Impact of Disease; IBDQ, Inflammatory Bowel Disease Questionnaire; DLQI, Dermatology Life Quality Index; ACR/EULAR, American College of Rheumatology/European League Against Rheumatism. |

**eTable 5. Demographic and Baseline Characteristics in Disease Subgroups**

| <b>eTable 5a: Demographic and baseline characteristics in rheumatoid arthritis</b>                                   |                                           |                                |
|----------------------------------------------------------------------------------------------------------------------|-------------------------------------------|--------------------------------|
|                                                                                                                      | <b>Therapeutic drug monitoring (n=38)</b> | <b>Standard therapy (n=42)</b> |
| <b>Demographics</b>                                                                                                  |                                           |                                |
| Age, mean (SD) y                                                                                                     | 54.7 (10.7)                               | 50.7 (16.5)                    |
| Women, No. (%)                                                                                                       | 32 (84%)                                  | 35 (83%)                       |
| Men, No. (%)                                                                                                         | 6 (16%)                                   | 17 (%)                         |
| Disease duration, mean (SD) y                                                                                        | 5.8 (0.9-12.6)                            | 3.8 (1.1-10.1)                 |
| <b>Medication, No. (%)</b>                                                                                           |                                           |                                |
| No prior biological treatment                                                                                        | 29 (76%)                                  | 28 (67%)                       |
| No prior TNF $\alpha$ inhibitor <sup>a</sup>                                                                         | 29 (76%)                                  | 29 (69%)                       |
| Used one prior TNF $\alpha$ inhibitor <sup>a</sup>                                                                   | 6 (16%)                                   | 11 (26%)                       |
| Used two or more prior TNF $\alpha$ inhibitors <sup>a</sup>                                                          | 3 (8%)                                    | 2 (5%)                         |
| Other prior biological treatment <sup>b</sup>                                                                        | 2 (5%)                                    | 3 (7%)                         |
| Concomitant immunosuppressive therapy <sup>c</sup>                                                                   | 34 (89%)                                  | 42 (100%)                      |
| Concomitant use of glucocorticoids                                                                                   | 18 (47%)                                  | 12 (29%)                       |
| <b>General baseline characteristics</b>                                                                              |                                           |                                |
| Erythrocyte sedimentation rate (mm/h), median (IQR)                                                                  | 14.0 (7.0-24.0)                           | 13.5 (7.0-26.0)                |
| C-reactive protein (mg/L), median (IQR)                                                                              | 4.0 (2.0-7.0)                             | 4.0 (1.0-9.0)                  |
| Abbreviations: SD, standard deviation; TNF, tumor necrosis factor; IQR, interquartile range.                         |                                           |                                |
| <sup>a</sup> Prior TNFi includes: Etanercept, adalimumab, certolizumab pegol, golimumab, and Infliximab.             |                                           |                                |
| <sup>b</sup> Other biologics includes: abatacept, rituximab, secukinumab, tocilizumab, ustekinumab, and vedolizumab. |                                           |                                |
| <sup>c</sup> Concomitant immunosuppressive medication includes methotrexate, leflunomide and sulfasalazine.          |                                           |                                |

| <b>eTable 5b: Demographic and baseline characteristics in psoriatic arthritis</b>                                    |                                           |                                |
|----------------------------------------------------------------------------------------------------------------------|-------------------------------------------|--------------------------------|
|                                                                                                                      | <b>Therapeutic drug monitoring (n=20)</b> | <b>Standard therapy (n=22)</b> |
| <b>Demographics</b>                                                                                                  |                                           |                                |
| Age, mean (SD) y                                                                                                     | 53.5 (13.7)                               | 46.1 (12.9)                    |
| Women, No. (%)                                                                                                       | 16 (80%)                                  | 10 (45%)                       |
| Men, No. (%)                                                                                                         | 4 (20%)                                   | 12 (55%)                       |
| Disease duration, mean (SD) y                                                                                        | 10.9 (3.1-20.5)                           | 2.3 (0.7-9.5)                  |
| <b>Medication, No. (%)</b>                                                                                           |                                           |                                |
| No prior biological treatment                                                                                        | 8 (40%)                                   | 18 (82%)                       |
| No prior TNF $\alpha$ inhibitor <sup>a</sup>                                                                         | 8 (40%)                                   | 18 (82%)                       |
| Used one prior TNF $\alpha$ inhibitor <sup>a</sup>                                                                   | 6 (30%)                                   | 2 (9%)                         |
| Used two or more prior TNF $\alpha$ inhibitors <sup>a</sup>                                                          | 6 (30%)                                   | 2 (9%)                         |
| Other prior biological treatment <sup>b</sup>                                                                        | 3 (15%)                                   | 1 (5%)                         |
| Concomitant immunosuppressive therapy <sup>c</sup>                                                                   | 16 (80%)                                  | 17 (77%)                       |
| Concomitant use of glucocorticoids                                                                                   | 1 (5%)                                    | 4 (18%)                        |
| <b>General baseline characteristics</b>                                                                              |                                           |                                |
| Erythrocyte sedimentation rate (mm/h), median (IQR)                                                                  | 14.5 (7.0-23.0)                           | 15.0 (6.0-27.0)                |
| C-reactive protein (mg/L), median (IQR)                                                                              | 3.5 (2.0-11.5)                            | 6.5 (1.0-24.0)                 |
| Abbreviations: SD, standard deviation; TNF, tumor necrosis factor; IQR, interquartile range.                         |                                           |                                |
| <sup>a</sup> Prior TNFi includes: Etanercept, adalimumab, certolizumab pegol, golimumab, and Infliximab.             |                                           |                                |
| <sup>b</sup> Other biologics includes: abatacept, rituximab, secukinumab, tocilizumab, ustekinumab, and vedolizumab. |                                           |                                |
| <sup>c</sup> Concomitant immunosuppressive medication includes methotrexate, leflunomide and sulfasalazine.          |                                           |                                |

| <b>eTable 5c: Demographic and baseline characteristics in spondyloarthritis</b>                                      |                                           |                                |
|----------------------------------------------------------------------------------------------------------------------|-------------------------------------------|--------------------------------|
|                                                                                                                      | <b>Therapeutic drug monitoring (n=59)</b> | <b>Standard therapy (n=58)</b> |
| <b>Demographics</b>                                                                                                  |                                           |                                |
| Age, mean (SD) y                                                                                                     | 44.8 (13.9)                               | 42.6 (14.1)                    |
| Women, No. (%)                                                                                                       | 29 (49%)                                  | 21 (36%)                       |
| Men, No. (%)                                                                                                         | 30 (51%)                                  | 37 (64%)                       |
| Disease duration, mean (SD) y                                                                                        | 3.3 (0.5-14.7)                            | 3.1 (0.4-14.2)                 |
| <b>Medication, No. (%)</b>                                                                                           |                                           |                                |
| No prior biological treatment                                                                                        | 40 (68%)                                  | 37 (64%)                       |
| No prior TNF $\alpha$ inhibitor <sup>a</sup>                                                                         | 41 (69%)                                  | 37 (64%)                       |
| Used one prior TNF $\alpha$ inhibitor <sup>a</sup>                                                                   | 12 (20%)                                  | 10 (17%)                       |
| Used two or more prior TNF $\alpha$ inhibitors <sup>a</sup>                                                          | 6 (10%)                                   | 11 (20%)                       |
| Other prior biological treatment <sup>b</sup>                                                                        | 2 (3%)                                    | 3 (5%)                         |
| Concomitant immunosuppressive therapy <sup>c</sup>                                                                   | 16 (27%)                                  | 11 (19%)                       |
| Concomitant use of glucocorticoids                                                                                   | 2 (3%)                                    | 2 (3%)                         |
| <b>General baseline characteristics</b>                                                                              |                                           |                                |
| Erythrocyte sedimentation rate (mm/h), median (IQR)                                                                  | 17.0 (6.0-35.0)                           | 14.5 (6.0-27.0)                |
| C-reactive protein (mg/L), median (IQR)                                                                              | 5.0 (2.0-16.0)                            | 5.5 (2.0-16.0)                 |
| Abbreviations: SD, standard deviation; TNF, tumor necrosis factor; IQR, interquartile range.                         |                                           |                                |
| <sup>a</sup> Prior TNFi includes: Etanercept, adalimumab, certolizumab pegol, golimumab, and Infliximab.             |                                           |                                |
| <sup>b</sup> Other biologics includes: abatacept, rituximab, secukinumab, tocilizumab, ustekinumab, and vedolizumab. |                                           |                                |
| <sup>c</sup> Concomitant immunosuppressive medication includes methotrexate, leflunomide and sulfasalazine.          |                                           |                                |

| <b>eTable 5d: Demographic and baseline characteristics in ulcerative colitis</b>                                          |                                           |                                |
|---------------------------------------------------------------------------------------------------------------------------|-------------------------------------------|--------------------------------|
|                                                                                                                           | <b>Therapeutic drug monitoring (n=39)</b> | <b>Standard therapy (n=41)</b> |
| <b>Demographics</b>                                                                                                       |                                           |                                |
| Age, mean (SD) y                                                                                                          | 38.8 (14.5)                               | 41.3 (16.2)                    |
| Women, No. (%)                                                                                                            | 15 (39%)                                  | 13 (32%)                       |
| Men, No. (%)                                                                                                              | 24 (62%)                                  | 28 (68%)                       |
| Disease duration, mean (SD) y                                                                                             | 2.1 (0.6-5.1)                             | 2.4 (0.9-7.8)                  |
| <b>Medication, No. (%)</b>                                                                                                |                                           |                                |
| No prior biological treatment                                                                                             | 37 (95%)                                  | 38 (98%)                       |
| No prior TNF $\alpha$ inhibitor <sup>a</sup>                                                                              | 37 (95%)                                  | 40 (98%)                       |
| Used one prior TNF $\alpha$ inhibitor <sup>a</sup>                                                                        | 2 (5%)                                    | 1 (2%)                         |
| Used two or more prior TNF $\alpha$ inhibitors <sup>a</sup>                                                               | 0                                         | 0                              |
| Other prior biological treatment <sup>b</sup>                                                                             | 0                                         | 0                              |
| Concomitant immunosuppressive therapy <sup>c</sup>                                                                        | 15 (38%)                                  | 17 (41%)                       |
| Concomitant use of glucocorticoids                                                                                        | 19 (49%)                                  | 8 (20%)                        |
| <b>General baseline characteristics</b>                                                                                   |                                           |                                |
| Erythrocyte sedimentation rate (mm/h), median (IQR)                                                                       | 11.0 (4.0-20.0)                           | 11.0 (3.0-21.0)                |
| C-reactive protein (mg/L), median (IQR)                                                                                   | 4.0 (1.0-24.0)                            | 4.0 (1.0-20.0)                 |
| Abbreviations: SD, standard deviation; TNF, tumor necrosis factor; IQR, interquartile range.                              |                                           |                                |
| <sup>a</sup> Prior TNFi includes: Etanercept, adalimumab, certolizumab pegol, golimumab, and Infliximab.                  |                                           |                                |
| <sup>b</sup> Other biologics includes: abatacept, rituximab, secukinumab, tocilizumab, ustekinumab, and vedolizumab.      |                                           |                                |
| <sup>c</sup> Concomitant immunosuppressive medication includes methotrexate, leflunomide, azathioprine and sulfasalazine. |                                           |                                |

| <b>eTable 5e: Demographic and baseline characteristics in Crohn's disease</b>                                             |                                           |                                |
|---------------------------------------------------------------------------------------------------------------------------|-------------------------------------------|--------------------------------|
|                                                                                                                           | <b>Therapeutic drug monitoring (n=29)</b> | <b>Standard therapy (n=28)</b> |
| <b>Demographics</b>                                                                                                       |                                           |                                |
| Age, mean (SD) y                                                                                                          | 35.4 (11.0)                               | 41.0 (11.5)                    |
| Women, No. (%)                                                                                                            | 14 (48%)                                  | 13 (46%)                       |
| Men, No. (%)                                                                                                              | 15 (52%)                                  | 15 (54%)                       |
| Disease duration, mean (SD) y                                                                                             | 1.1 (0.7-2.8)                             | 6.7 (0.7-18.2)                 |
| <b>Medication, No. (%)</b>                                                                                                |                                           |                                |
| No prior biological treatment                                                                                             | 26 (90%)                                  | 24 (86%)                       |
| No prior TNF $\alpha$ inhibitor <sup>a</sup>                                                                              | 26 (90%)                                  | 24 (86%)                       |
| Used one prior TNF $\alpha$ inhibitor <sup>a</sup>                                                                        | 3 (10%)                                   | 4 (14%)                        |
| Used two or more prior TNF $\alpha$ inhibitors <sup>a</sup>                                                               | 0                                         | 0                              |
| Other prior biological treatment <sup>b</sup>                                                                             | 0                                         | 1 (4%)                         |
| Concomitant immunosuppressive therapy <sup>c</sup>                                                                        | 23 (79%)                                  | 14 (50%)                       |
| Concomitant use of glucocorticoids                                                                                        | 1 (3%)                                    | 5 (18%)                        |
| <b>General baseline characteristics</b>                                                                                   |                                           |                                |
| Erythrocyte sedimentation rate (mm/h), median (IQR)                                                                       | 15.0 (9.0-27.0)                           | 14.5 (6.0-24.0)                |
| C-reactive protein (mg/L), median (IQR)                                                                                   | 12.0 (7.0-17.0)                           | 7.0 (1.0-16.5)                 |
| Abbreviations: SD, standard deviation; TNF, tumor necrosis factor; IQR, interquartile range.                              |                                           |                                |
| <sup>a</sup> Prior TNFi includes: Etanercept, adalimumab, certolizumab pegol, golimumab, and Infliximab.                  |                                           |                                |
| <sup>b</sup> Other biologics includes: abatacept, rituximab, secukinumab, tocilizumab, ustekinumab, and vedolizumab.      |                                           |                                |
| <sup>c</sup> Concomitant immunosuppressive medication includes methotrexate, leflunomide, azathioprine and sulfasalazine. |                                           |                                |

| <b>eTable 5f: Demographic and baseline characteristics in psoriasis</b>                                              |                                           |                               |
|----------------------------------------------------------------------------------------------------------------------|-------------------------------------------|-------------------------------|
|                                                                                                                      | <b>Therapeutic drug monitoring (n=13)</b> | <b>Standard therapy (n=9)</b> |
| <b>Demographics</b>                                                                                                  |                                           |                               |
| Age, mean (SD) y                                                                                                     | 48.8 (16.6)                               | 40.2 (11.4)                   |
| Women, No. (%)                                                                                                       | 4 (31%)                                   | 1 (11%)                       |
| Men, No. (%)                                                                                                         |                                           |                               |
| Disease duration, mean (SD) y                                                                                        | 20.7 (14.7-35.8)                          | 17.8 (5.1-23.8)               |
| <b>Medication, No. (%)</b>                                                                                           |                                           |                               |
| No prior biological treatment                                                                                        | 11 (85%)                                  | 8 (89%)                       |
| No prior TNF $\alpha$ inhibitor <sup>a</sup>                                                                         | 12 (92%)                                  | 8 (89%)                       |
| Used one prior TNF $\alpha$ inhibitor <sup>a</sup>                                                                   | 1 (8%)                                    | 1 (11%)                       |
| Used two or more prior TNF $\alpha$ inhibitors <sup>a</sup>                                                          | 0                                         | 0                             |
| Other prior biological treatment <sup>b</sup>                                                                        | 1 (8%)                                    | 1 (11%)                       |
| Concomitant immunosuppressive therapy <sup>c</sup>                                                                   | 7 (54%)                                   | 9 (100%)                      |
| Concomitant use of glucocorticoids                                                                                   | 0                                         | 0                             |
| <b>General baseline characteristics</b>                                                                              |                                           |                               |
| Erythrocyte sedimentation rate (mm/h), median (IQR)                                                                  | 5.5 (3.0-9.0)                             | 2.0 (1.0-3.0)                 |
| C-reactive protein (mg/L), median (IQR)                                                                              | 1.0 (1.0-2.0)                             | 1.0 (1.0-3.0)                 |
| Abbreviations: SD, standard deviation; TNF, tumor necrosis factor; IQR, interquartile range.                         |                                           |                               |
| <sup>a</sup> Prior TNFi includes: Etanercept, adalimumab, certolizumab pegol, golimumab, and Infliximab.             |                                           |                               |
| <sup>b</sup> Other biologics includes: abatacept, rituximab, secukinumab, tocilizumab, ustekinumab, and vedolizumab. |                                           |                               |
| <sup>c</sup> Concomitant immunosuppressive medication includes methotrexate, leflunomide and sulfasalazine.          |                                           |                               |

**eTable 6. Sensitivity Analyses of the Primary Endpoint**

| <b>eTable 6a: Pre-specified sensitivity analyses of the primary endpoint</b>                                                                                                                                                                                                                                                                                                                                                                                          |                                    |                         |                                     |
|-----------------------------------------------------------------------------------------------------------------------------------------------------------------------------------------------------------------------------------------------------------------------------------------------------------------------------------------------------------------------------------------------------------------------------------------------------------------------|------------------------------------|-------------------------|-------------------------------------|
| <b>Analysis</b>                                                                                                                                                                                                                                                                                                                                                                                                                                                       | <b>Therapeutic drug monitoring</b> | <b>Standard therapy</b> | <b>Difference in remission rate</b> |
| Baseline adjusted <sup>a</sup>                                                                                                                                                                                                                                                                                                                                                                                                                                        | 100/189 (53)                       | 106/196 (54)            | -0.2% (-9.6,9.4)                    |
| Worst-case imputation                                                                                                                                                                                                                                                                                                                                                                                                                                                 | 100/198 (51)                       | 106/200 (53)            | 2.7% (-6.8,12.3)                    |
| Best-case imputation                                                                                                                                                                                                                                                                                                                                                                                                                                                  | 109/198 (55)                       | 110/200 (55)            | 0.2% (-9.3,9.7)                     |
| Complete-case analyses                                                                                                                                                                                                                                                                                                                                                                                                                                                | 100/189 (53)                       | 106/196 (54)            | 1.5% (-8.2,11.1)                    |
| Last observation carried forward                                                                                                                                                                                                                                                                                                                                                                                                                                      | 101/198 (51)                       | 107/198 (54)            | 3.4% (-6.2,12.9)                    |
| Patients with high adherence to the protocol <sup>b</sup>                                                                                                                                                                                                                                                                                                                                                                                                             | 93/136 (53)                        | 103/156 (55)            | 1.9% (-8.1,11.8)                    |
| <p>Data are No. (%).</p> <p><sup>a</sup> Adjusted for the following baseline factors: age, gender, prednisolone use, number of prior TNF inhibitors, immunosuppressive co-medication, disease activity</p> <p><sup>b</sup> Patients with high adherence to the protocol defined as patients without study withdrawals prior to the week 30 visit, deviations to eligibility criteria, intervals between infusions &gt;12 weeks, or deviations to the TDM strategy</p> |                                    |                         |                                     |

| <b>eTable 6b: Post hoc sensitivity analyses of the primary endpoint</b> |                                    |                         |                                     |
|-------------------------------------------------------------------------|------------------------------------|-------------------------|-------------------------------------|
| <b>Analysis</b>                                                         | <b>Therapeutic drug monitoring</b> | <b>Standard therapy</b> | <b>Difference in remission rate</b> |
| Center as random effect                                                 | 100/189 (53)                       | 106/196 (54)            | 0.9% (-8.6,10.4)                    |
| Center as fixed effect                                                  | 100/189 (53)                       | 106/196 (54)            | 0.7% (-8.7,10.1)                    |
| All patients receiving ≥1 dose of infliximab                            | 104/194 (54)                       | 107/199 (54)            | 0.0% (-9.4,9.5)                     |
| <p>Data are No. (%).</p>                                                |                                    |                         |                                     |

**eTable 7. Results Secondary Endpoints**

|                                                                            | Baseline                    |                    | Week 30                     |                  | Difference at 30 weeks (95% CI) |
|----------------------------------------------------------------------------|-----------------------------|--------------------|-----------------------------|------------------|---------------------------------|
|                                                                            | Therapeutic drug monitoring | Standard therapy   | Therapeutic drug monitoring | Standard therapy |                                 |
|                                                                            | Observed values             |                    | Change from baseline        |                  |                                 |
| <b>Continuous outcomes</b>                                                 |                             |                    |                             |                  |                                 |
| <b>Measures of disease activity</b>                                        |                             |                    |                             |                  |                                 |
| Physician's global assessment of disease activity                          | 46.6 (21.1)                 | 46.4 (21.6)        | -28.4 (24.9)                | -27.2 (27.7)     | 1.7 (-1.8,5.2)                  |
| Patient's global assessment of disease activity                            | 59.6 (23.0)                 | 56.8 (22.3)        | -30.6 (29.6)                | -24.8 (27.7)     | 3.7 (-0.6,8.0)                  |
| Erythrocyte sedimentation rate, mm/h                                       | 13.0 (6.0,25.0)             | 14.0 (6.0,25.0)    | -7.2 (19.1)                 | -6.0 (14.4)      | -0.3 (-2.4,1.7)                 |
| C-reactive protein, mg/L                                                   | 5.0 (2.0,14.0)              | 5.0 (1.0,15.0)     | -6.6 (21.7)                 | -5.8 (14.0)      | -0.4 (-2.0,1.2)                 |
| Disease Activity Score 28 joints (DAS28) <sup>RA/PsA</sup>                 | 4.5 (1.1)                   | 4.5 (1.2)          | -1.5 (1.2)                  | -1.8 (1.6)       | -0.3 (-0.7,0.1)                 |
| Simple Disease Activity Index (SDAI) <sup>RA/PsA</sup>                     | 22.4 (10.8)                 | 23.1 (12.2)        | -12.2 (9.8)                 | -13.5 (14.4)     | -0.7 (-3.7,2.4)                 |
| Modified Health Assessment Questionnaire (MHAQ) <sup>RA/PsA/SpA</sup>      | 0.6 (0.4)                   | 0.6 (0.4)          | -0.3 (0.5)                  | -0.3 (0.4)       | 0.0 (-0.1,0.1)                  |
| Disease Activity in Psoriatic Arthritis (DAPSA) <sup>PsA</sup>             | 31.4 (12.6)                 | 36.6 (25.1)        | -13.6 (16.5)                | -25.1 (26.5)     | -6.2 (-13.1,0.7)                |
| Bath Ankylosing Spondylitis Disease Activity Index (BASDAI) <sup>SpA</sup> | 5.1 (1.7)                   | 5.3 (1.5)          | -2.0 (2.3)                  | -2.2 (2.0)       | -0.0 (-0.7,0.6)                 |
| Ankylosing Spondylitis Disease Activity Score (ASDAS) <sup>SpA</sup>       | 3.1 (1.0)                   | 3.1 (0.9)          | -1.4 (1.4)                  | -1.3 (1.1)       | 0.2 (-0.2,0.5)                  |
| Partial Mayo Score (PMS) <sup>UC</sup>                                     | 5.7 (1.9)                   | 5.3 (1.9)          | -4.0 (2.5)                  | -3.7 (3.0)       | -0.1 (-1.0,0.9)                 |
| Harvey-Bradshaw Index (HBI) <sup>CD</sup>                                  | 8.7 (4.3)                   | 7.8 (3.9)          | -4.4 (3.5)                  | -2.0 (7.1)       | 1.9 (-0.0,3.8)                  |
| Calprotectin, mg/kg <sup>CD,UC</sup>                                       | 1375<br>(398,3000)          | 1096<br>(248,3000) | -1727<br>(1631)             | -1230<br>(1285)  | 64.2<br>(-463,591)              |
| Psoriasis Area and Severity Index (PASI) <sup>Ps</sup>                     | 10.1 (4.8)                  | 9.7 (4.1)          | -6.5 (4.3)                  | -6.4 (4.0)       | 0.0 (-2.6,2.7)                  |



|                                                                             | Baseline                    | Baseline         | Week 30                     | Week 30          | Difference at 30 weeks (95% CI) |
|-----------------------------------------------------------------------------|-----------------------------|------------------|-----------------------------|------------------|---------------------------------|
|                                                                             | Therapeutic drug monitoring | Standard therapy | Therapeutic drug monitoring | Standard therapy |                                 |
|                                                                             | Observed values             |                  | Change from baseline        |                  |                                 |
| <b>Quality of life and utility endpoints</b>                                |                             |                  |                             |                  |                                 |
| SF-36 physical function                                                     | 64.0 (25.0)                 | 66.1 (22.5)      | 12.9 (22.7)                 | 11.4 (21.6)      | -1.3 (-4.6,2.1)                 |
| SF-36 role limitation physical                                              | 22.3 (32.2)                 | 26.4 (37.1)      | 27.2 (44.3)                 | 25.8 (45.3)      | 0.7 (-6.7,8.1)                  |
| SF-36 pain                                                                  | 51.0 (21.5)                 | 54.5 (21.2)      | 16.7 (27.5)                 | 14.7 (27.7)      | 0.7 (-3.4,4.8)                  |
| SF-36 general health                                                        | 49.9 (19.6)                 | 50.9 (19.6)      | 3.9 (17.1)                  | 5.4 (17.5)       | 1.8 (-1.3,4.9)                  |
| SF-36 emotional well-being                                                  | 68.0 (17.2)                 | 72.0 (17.5)      | 5.6 (16.3)                  | 4.7 (15.3)       | 1.2 (-1.4,3.9)                  |
| SF-36 role limitation emotional                                             | 51.5 (42.8)                 | 57.7 (44.7)      | 14.4 (49.8)                 | 10.1 (51.0)      | 0.7 (-6.9,8.3)                  |
| SF-36 social functioning                                                    | 60.4 (26.9)                 | 63.4 (26.5)      | 15.2 (24.9)                 | 14.3 (26.7)      | 0.9 (-2.9,4.8)                  |
| SF-36 energy/fatigue                                                        | 31.5 (19.1)                 | 35.3 (19.9)      | 13.5 (20.8)                 | 14.8 (20.9)      | 2.8 (-1.0,6.6)                  |
| SF-36 physical component summary score                                      | 38.4 (8.7)                  | 38.8 (8.6)       | 6.0 (10.0)                  | 6.0 (9.5)        | -0.0 (-1.5,1.5)                 |
| SF-36 mental component summary score                                        | 43.0 (11.0)                 | 45.2 (11.5)      | 4.0 (11.5)                  | 3.4 (10.4)       | 0.9 (-0.8,2.7)                  |
| EQ5D VAS                                                                    | 52.7 (20.0)                 | 54.5 (20.3)      | 14.4 (26.6)                 | 12.6 (24.3)      | -0.3 (-4.2,3.6)                 |
| EQ5D index (UK weighted)                                                    | 0.6 (0.3)                   | 0.5 (0.3)        | 0.1 (0.3)                   | 0.2 (0.3)        | 0.0 (-0.0,0.1)                  |
| WPAI Percent work missed due to specified problem (Absenteeism)             | 34.0 (41.3)                 | 30.4 (36.9)      | -19.2 (43.8)                | -14.9 (36.9)     | 3.0 (-3.9,10.0)                 |
| WPAI Percent impairment while working due to specified problem (Presentism) | 38.4 (23.8)                 | 36.7 (25.3)      | -19.3 (25.7)                | -14.3 (27.8)     | -1.0 (-6.5,4.5)                 |
| WPAI Percent overall work impairment due to specified problem               | 44.0 (26.0)                 | 44.1 (28.8)      | -22.5 (27.7)                | -17.0 (33.0)     | 0.7 (-6.0,7.3)                  |
| WPAI Percent activity impairment due to specified problem                   | 53.2 (26.2)                 | 49.8 (25.4)      | -19.5 (28.9)                | -19.7 (28.2)     | -1.8 (-6.2,2.7)                 |
| Pain VAS <sup>RA/PsA/SpA</sup>                                              | 51.7 (20.3)                 | 50.8 (21.9)      | -24.4 (28.0)                | -20.5 (25.2)     | 3.4 (-2.1,8.9)                  |
| Fatigue VAS <sup>RA/PsA/SpA</sup>                                           | 62.8 (25.4)                 | 59.3 (26.1)      | -18.6 (26.2)                | -19.4 (28.1)     | -2.8 (-7.5,1.8)                 |
| RAID Total score <sup>RA</sup>                                              | 4.8 (2.2)                   | 4.5 (2.1)        | -1.4 (2.0)                  | -1.2 (2.4)       | 0.1 (-0.7,0.9)                  |
| PsAID Total score <sup>PsA</sup>                                            | 5.1 (1.3)                   | 4.9 (1.6)        | -1.8 (1.7)                  | -1.7 (1.6)       | -0.1 (-1.0,0.8)                 |
| IBDQ Total score <sup>CD/UC</sup>                                           | 133.2 (35.2)                | 141.5 (30.4)     | 35.2 (33.1)                 | 34.0 (31.2)      | 4.0 (-4.5,12.6)                 |
| DLQI Total score <sup>Ps</sup>                                              | 8.4 (9.6)                   | 6.9 (6.5)        | -3.4 (5.9)                  | -4.3 (5.1)       | -0.9 (-2.4,0.6)                 |

|                                              |  |  | <b>Week 30<br/>No. (%)</b>             | <b>Week 30<br/>No. (%)</b>  | <b>Difference at<br/>30 weeks (95% CI)</b> |
|----------------------------------------------|--|--|----------------------------------------|-----------------------------|--------------------------------------------|
|                                              |  |  | <b>Therapeutic<br/>drug monitoring</b> | <b>Standard<br/>therapy</b> |                                            |
| <b>State variables</b>                       |  |  |                                        |                             |                                            |
| <b>Measures of disease activity</b>          |  |  |                                        |                             |                                            |
| DAS28 remission status <sup>RA/PsA</sup>     |  |  | 26 (48.1)                              | 33 (52.4)                   | 4.2% (-13.8,22.3)                          |
| SDAI remission status <sup>RA/PsA</sup>      |  |  | 18 (34.0)                              | 20 (31.7)                   | -2.1% (-19.2,15.0)                         |
| ACR/EULAR remission status <sup>RA/PsA</sup> |  |  | 15 (27.8)                              | 19 (30.2)                   | 2.4% (-14.1,18.8)                          |
| ASDAS remission status <sup>SpA</sup>        |  |  | 23 (40.4)                              | 21 (36.8)                   | -3.5% (-21.4,14.4)                         |
| PMS remission status <sup>UC</sup>           |  |  | 25 (65.8)                              | 29 (70.7)                   | 4.9% (-15.6,25.5)                          |
| HBI remission status <sup>CD</sup>           |  |  | 17 (60.7)                              | 17 (65.4)                   | 4.7% (-21.1,30.4)                          |
| PASI remission status <sup>Ps</sup>          |  |  | 9 (75.0)                               | 6 (66.7)                    | -8.3% (-47.7,31.0)                         |
| EULAR response <sup>RA/PsA</sup>             |  |  | 25 (46.3)                              | 34 (54.0)                   | 5.2 (-10.5-20.8)                           |
| EULAR good response                          |  |  |                                        |                             |                                            |
| EULAR response <sup>RA/PsA</sup>             |  |  | 12 (22.2)                              | 18 (28.6)                   | 9.4% (9.1,27.9)                            |
| EULAR moderate response                      |  |  |                                        |                             |                                            |
| Remission at week 14                         |  |  | 91 (48.9)                              | 104 (54.2)                  | 5.9% (-3.7-15.6)                           |
| Improvement at week 14                       |  |  | 166 (87.4)                             | 179 (87.6)                  | 0.3% (-6.6-7.3)                            |
| ACR20 <sup>RA/PsA</sup>                      |  |  | 29 (55.8)                              | 37 (58.7)                   | 3.0% (-15.2,21.1)                          |
| ACR50 <sup>RA/PsA</sup>                      |  |  | 19 (36.5)                              | 27 (42.9)                   | 6.3% (-11.5,24.2)                          |
| ACR70 <sup>RA/PsA</sup>                      |  |  | 12 (23.1)                              | 17 (27.0)                   | 3.9% (-12.0,19.7)                          |
| PASI mild to moderate disease <sup>a</sup>   |  |  | 10 (83.3)                              | 9 (100)                     |                                            |
| PASI complete clearance <sup>a</sup>         |  |  | 1 (8.3)                                | 0 (0)                       |                                            |

<sup>a</sup> Results not reported. Analyses not applicable due to small numbers.

Data are mean (SD) at baseline and mean (SD) change (follow-up minus baseline) from baseline. Difference is adjusted treatment difference at week 30 with 95% confidence interval. Data are N (%) of state at study end. Difference is adjusted treatment difference at study end. Details regarding the assessments are given in eTable 3.

Abbreviations: CI, Confidence interval; DAS28, Disease Activity Score in 28 joints with ESR; SDAI, Simplified Disease Activity Index; MHAQ, Modified Health Assessment Questionnaire; DAPSA, Disease Activity in Psoriatic Arthritis; BASDAI, Bath Ankylosing Spondylitis Disease Activity Index; ASDAS, Ankylosing Spondylitis Disease Activity Score; PMS, Partial Mayo Score; HBI, Harvey-Bradshaw Index; PASI, Psoriasis Area and Severity Index; SF-36, RAND Short Form Health Survey t-scores using Norwegian norms; EQ-5D, EuroQol questionnaire time trade-off United Kingdom weighted; VAS, visual analogue scale; WPAI, Work Productivity And Impairment questionnaire; RAID, Rheumatoid Arthritis Impact of Disease; PsAID, Psoriatic Arthritis Impact of Disease; IBDQ, Inflammatory Bowel Disease Questionnaire; DLQI, Dermatology Life Quality Index; ACR/EULAR, American College of Rheumatology/European League Against Rheumatism;

**eTable 8. Secondary Efficacy Endpoints (by Disease Subgroup)**

|                                                                                                                                                                                                                                                                                                                                                                                         | Baseline                    |                  | Week 30                     |                  | Difference at 30 weeks (95% CI) |
|-----------------------------------------------------------------------------------------------------------------------------------------------------------------------------------------------------------------------------------------------------------------------------------------------------------------------------------------------------------------------------------------|-----------------------------|------------------|-----------------------------|------------------|---------------------------------|
|                                                                                                                                                                                                                                                                                                                                                                                         | Therapeutic drug monitoring | Standard therapy | Therapeutic drug monitoring | Standard therapy |                                 |
|                                                                                                                                                                                                                                                                                                                                                                                         | Observed values             |                  | Change from baseline        |                  |                                 |
| <b>Measures of disease activity</b>                                                                                                                                                                                                                                                                                                                                                     |                             |                  |                             |                  |                                 |
| <b>Physician's global assessment of disease activity (VAS 0-100)</b>                                                                                                                                                                                                                                                                                                                    |                             |                  |                             |                  |                                 |
| Rheumatoid arthritis                                                                                                                                                                                                                                                                                                                                                                    | 40.5 (18.7)                 | 39.3 (20.9)      | -23.6 (23.1)                | -21.5 (27.8)     | 2.9 (-4.3,10.1)                 |
| Spondyloarthritis                                                                                                                                                                                                                                                                                                                                                                       | 40.9 (19.5)                 | 40.3 (21.4)      | -26.2 (23.3)                | -25.0 (25.2)     | 1.2 (-4.4,6.8)                  |
| Psoriatic arthritis                                                                                                                                                                                                                                                                                                                                                                     | 42.3 (23.1)                 | 42.9 (19.7)      | -23.3 (27.7)                | -28.9 (22.2)     | -5.3 (-14.6,4.0)                |
| Ulcerative colitis                                                                                                                                                                                                                                                                                                                                                                      | 59.7 (19.6)                 | 58.8 (20.5)      | -40.5 (25.3)                | -34.5 (30.3)     | 5.6 (-3.9,15.2)                 |
| Crohn's disease                                                                                                                                                                                                                                                                                                                                                                         | 53.1 (17.4)                 | 53.3 (18.9)      | -25.6 (24.4)                | -25.9 (34.4)     | 0.8 (-9.4,10.9)                 |
| Psoriasis                                                                                                                                                                                                                                                                                                                                                                               | 43.5 (25.3)                 | 50.7 (15.6)      | -28.6 (25.7)                | -34.0 (16.9)     | 0.8 (-12.6,14.3)                |
| <b>Patient's global assessment of disease activity (VAS 0-100)</b>                                                                                                                                                                                                                                                                                                                      |                             |                  |                             |                  |                                 |
| Rheumatoid arthritis                                                                                                                                                                                                                                                                                                                                                                    | 51.9 (24.8)                 | 51.9 (24.9)      | -22.6 (21.1)                | -20.1 (29.7)     | 3.0 (-6.2,12.2)                 |
| Spondyloarthritis                                                                                                                                                                                                                                                                                                                                                                       | 61.1 (20.0)                 | 57.3 (18.4)      | -32.5 (31.8)                | -24.2 (23.6)     | 6.1 (-2.0,14.1)                 |
| Psoriatic arthritis                                                                                                                                                                                                                                                                                                                                                                     | 52.5 (19.3)                 | 60.4 (20.7)      | -18.6 (29.2)                | -28.1 (25.1)     | -2.3 (-14.0,9.5)                |
| Ulcerative colitis                                                                                                                                                                                                                                                                                                                                                                      | 67.6 (21.6)                 | 61.9 (23.8)      | -44.7 (27.5)                | -34.4 (28.9)     | 5.5 (-4.5,15.4)                 |
| Crohn's disease                                                                                                                                                                                                                                                                                                                                                                         | 62.1 (22.3)                 | 51.4 (23.7)      | -27.1 (28.3)                | -16.0 (31.4)     | 0.6 (-11.7,12.9)                |
| Psoriasis                                                                                                                                                                                                                                                                                                                                                                               | 57.0 (34.4)                 | 61.9 (23.4)      | -29.3 (37.4)                | -25.4 (25.5)     | 5.0 (-10.6,20.6)                |
| <b>Erythrocyte sedimentation rate, mm/h</b>                                                                                                                                                                                                                                                                                                                                             |                             |                  |                             |                  |                                 |
| Rheumatoid arthritis                                                                                                                                                                                                                                                                                                                                                                    | 15.0 (9.0-27.0)             | 14.5 (6.0-24.0)  | -9.1 (12.3)                 | -6.3 (11.3)      | 1.8 (-2.7,6.2)                  |
| Spondyloarthritis                                                                                                                                                                                                                                                                                                                                                                       | 17.0 (6.0-35.0)             | 14.5 (6.0-27.0)  | -14.5 (23.0)                | -10.4 (17.5)     | 0.4 (-3.5,4.3)                  |
| Psoriatic arthritis                                                                                                                                                                                                                                                                                                                                                                     | 14.5 (7.0-23.0)             | 15.0 (6.0-27.0)  | -2.9 (24.8)                 | -7.7 (17.1)      | -5.1 (-11.8,1.6)                |
| Ulcerative colitis                                                                                                                                                                                                                                                                                                                                                                      | 11.0 (4.0-20.0)             | 11.0 (3.0-21.0)  | -6.8 (16.4)                 | -4.3 (9.6)       | 0.8 (-3.5,5.1)                  |
| Crohn's disease                                                                                                                                                                                                                                                                                                                                                                         | 15.0 (9.0-27.0)             | 14.5 (6.0-24.0)  | -9.1 (12.3)                 | -6.3 (11.3)      | 1.8 (-2.7,6.2)                  |
| Psoriasis                                                                                                                                                                                                                                                                                                                                                                               | 5.5 (3.0-9.0)               | 2.0 (1.0-3.0)    | 5.0 (9.3)                   | 0.6 (1.5)        | -0.7 (-5.0,3.6)                 |
| <b>C-reactive protein, mg/L</b>                                                                                                                                                                                                                                                                                                                                                         |                             |                  |                             |                  |                                 |
| Rheumatoid arthritis                                                                                                                                                                                                                                                                                                                                                                    | 4.0 (2.0-7.0)               | 4.0 (1.0-9.0)    | 0.2 (11.4)                  | -2.4 (7.8)       | -2.1 (-4.6,0.3)                 |
| Spondyloarthritis                                                                                                                                                                                                                                                                                                                                                                       | 5.0 (2.0-16.0)              | 5.5 (2.0-16.0)   | -10.1 (25.4)                | -8.5 (15.3)      | 1.2 (-1.4,3.8)                  |
| Psoriatic arthritis                                                                                                                                                                                                                                                                                                                                                                     | 3.5 (2.0-11.5)              | 6.5 (1.0-24.0)   | -6.5 (13.8)                 | -10.7 (14.5)     | -2.6 (-6.4,1.2)                 |
| Ulcerative colitis                                                                                                                                                                                                                                                                                                                                                                      | 4.0 (1.0-24.0)              | 4.0 (1.0-20.0)   | -8.2 (31.1)                 | -6.9 (13.8)      | -3.4 (-8.5,1.7)                 |
| Crohn's disease                                                                                                                                                                                                                                                                                                                                                                         | 12.0 (7.0-17.0)             | 7.0 (1.0-16.5)   | -9.1 (13.7)                 | -1.3 (18.6)      | 4.0 (-1.2,9.3)                  |
| Psoriasis                                                                                                                                                                                                                                                                                                                                                                               | 1.0 (1.0-2.0)               | 1.0 (1.0-3.0)    | 0.8 (3.6)                   | -1.0 (1.6)       | -1.7 (-4.8,1.3)                 |
| <p>Data are mean (SD) at baseline and mean (SD) change (follow-up minus baseline) from baseline. Difference is adjusted treatment difference at week 30 with 95% confidence interval. Difference is adjusted treatment difference at study end. Details regarding the assessments are given in eTable 3.</p> <p>Abbreviations: CI, Confidence interval; VAS, Visual analogue scale.</p> |                             |                  |                             |                  |                                 |

**eTable 9. Infliximab Discontinuation**

|                                                                          | <b>Therapeutic drug monitoring<br/>(n=198)</b> | <b>Standard therapy<br/>(n=200)</b> |
|--------------------------------------------------------------------------|------------------------------------------------|-------------------------------------|
| Infliximab discontinuation                                               | 59 (30)                                        | 43 (22)                             |
| Discontinuation due to adverse events                                    | 11 (6)                                         | 16 (8)                              |
| Discontinuation according to algorithm<br>(Anti-drug antibody formation) | 19 (10)                                        | -                                   |
| Discontinuation due to no improvement at week 14                         | 9 (5)                                          | 9 (5)                               |
| Discontinuation due to loss of response                                  | 11 (6)                                         | 11 (6)                              |
| Discontinuation due to intercurrent disease                              | 6 (3)                                          | 3 (2)                               |
| Other                                                                    | 3 (2)                                          | 4 (2)                               |
| Data are No. (%).                                                        |                                                |                                     |

**eFigure 1. Treatment Algorithm in the Therapeutic Drug Monitoring Group**

| Infusion # 1-4   |                                                                                                                                                                                                                                                                                                                                                                                                                         |                                                              |                                                                                            |                                                                                                                                                                                                            |                                                  |  |
|------------------|-------------------------------------------------------------------------------------------------------------------------------------------------------------------------------------------------------------------------------------------------------------------------------------------------------------------------------------------------------------------------------------------------------------------------|--------------------------------------------------------------|--------------------------------------------------------------------------------------------|------------------------------------------------------------------------------------------------------------------------------------------------------------------------------------------------------------|--------------------------------------------------|--|
| Serum infliximab | <p>&lt;20.0 mg/L at infusion #2<br/>                     &lt;15.0 mg/L at infusion #3<br/>                     &lt;3.0 mg/L at infusion #4</p> <p><b>Increase dose</b><br/>                     If ADA<sup>a</sup> ≤50 µg/L</p> <p>Or</p> <p><b>Switch therapy</b><br/>                     if<br/>                     ADA<sup>a</sup> &gt;50 µg/L</p>                                                                 |                                                              |                                                                                            | <p>≥20.0 mg/L at infusion #2<br/>                     ≥15.0 mg/L at infusion #3<br/>                     ≥3.0 mg/L at infusion #4</p> <p><b>No action</b><br/>                     Within target range</p> |                                                  |  |
|                  | <p><b>Guideline for action:</b> Increase the dose by shortening the infusion interval by 2 weeks.</p> <p><sup>a</sup>ADAb=Anti-drug antibodies</p>                                                                                                                                                                                                                                                                      |                                                              |                                                                                            |                                                                                                                                                                                                            |                                                  |  |
| Infusion # ≥5    |                                                                                                                                                                                                                                                                                                                                                                                                                         |                                                              |                                                                                            |                                                                                                                                                                                                            |                                                  |  |
| Serum infliximab | <p>≤2.0 mg/L</p> <p><b>Increase dose</b><br/>                     If ADA<sup>a</sup> ≤50 µg/L</p> <p>Or</p> <p><b>Switch therapy</b><br/>                     if<br/>                     ADA<sup>a</sup> &gt;50 µg/L</p>                                                                                                                                                                                               | <p>2.1 – 2.9 mg/L</p> <p><b>Consider increasing dose</b></p> | <p>3.0 – 8.0 mg/L</p> <p><b>No action</b><br/>                     Within target range</p> | <p>8.1 – 10.0 mg/L</p> <p><b>Consider decreasing dose</b></p>                                                                                                                                              | <p>&gt;10.0 mg/L</p> <p><b>Decrease dose</b></p> |  |
|                  | <p><b>Guideline for action:</b> Increase the dose preferably by increasing the given dose by 2-2,5 mg/kg to a maximum dose of 10 mg/kg or by shortening the infusion interval by 2 weeks to a minimum of 4 weeks. Decrease the dose preferably by increasing the infusion interval by 2 weeks to a maximum of 10 weeks or by decreasing the given dose by 2-2,5 mg/kg</p> <p><sup>a</sup>ADAb= Anti-drug antibodies</p> |                                                              |                                                                                            |                                                                                                                                                                                                            |                                                  |  |

**eFigure 2. Serum Infliximab Level**

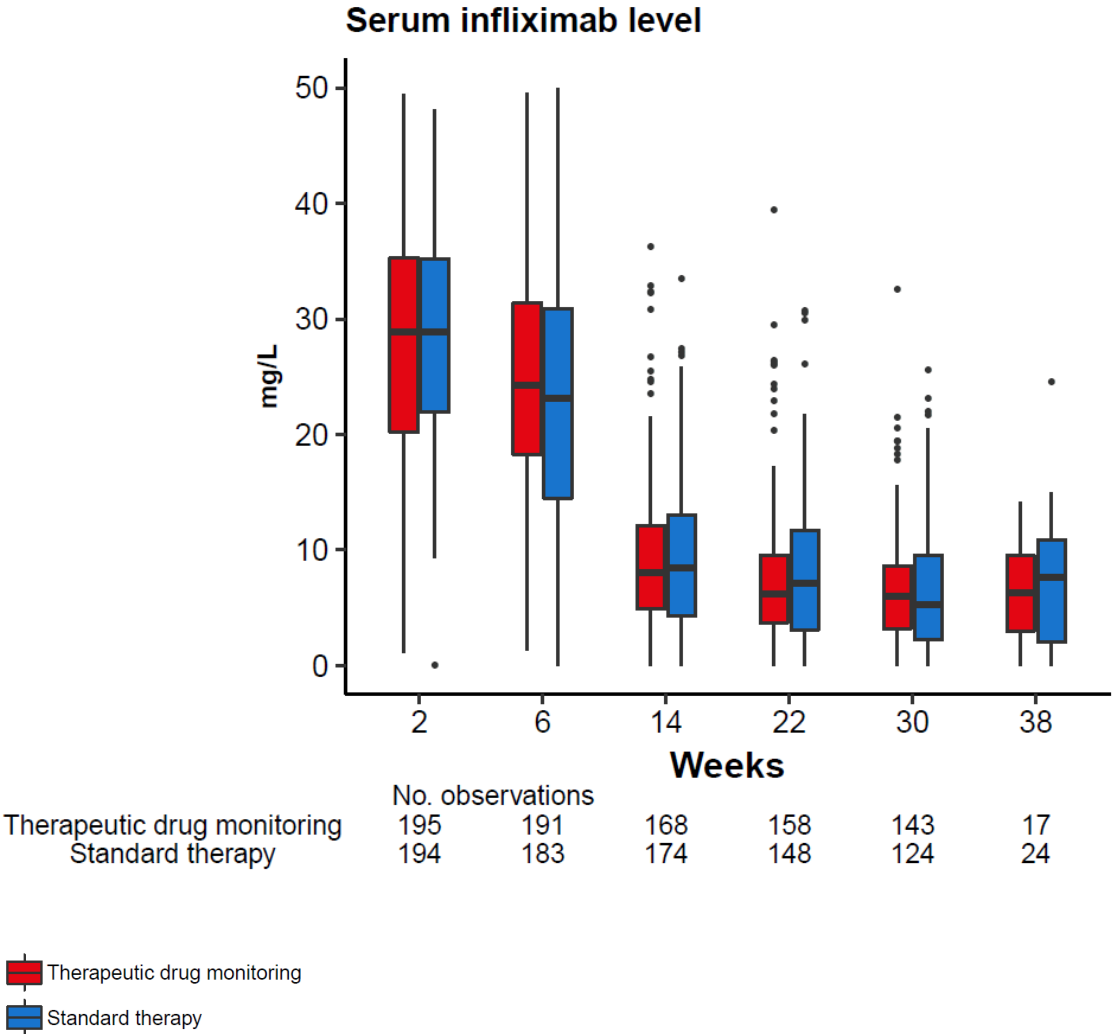

Red color denotes the therapeutic drug monitoring group, blue color denotes the standard therapy group. Boxes mark first and third quartiles (IQR), the band inside the box is the second quartile (the median), while the whiskers indicate the highest and lowest values within 1.5 x the interquartile range. Dots denote individual patients (outliers).

### eFigure 3. Secondary Efficacy Outcomes (Box and Whiskers Plots)

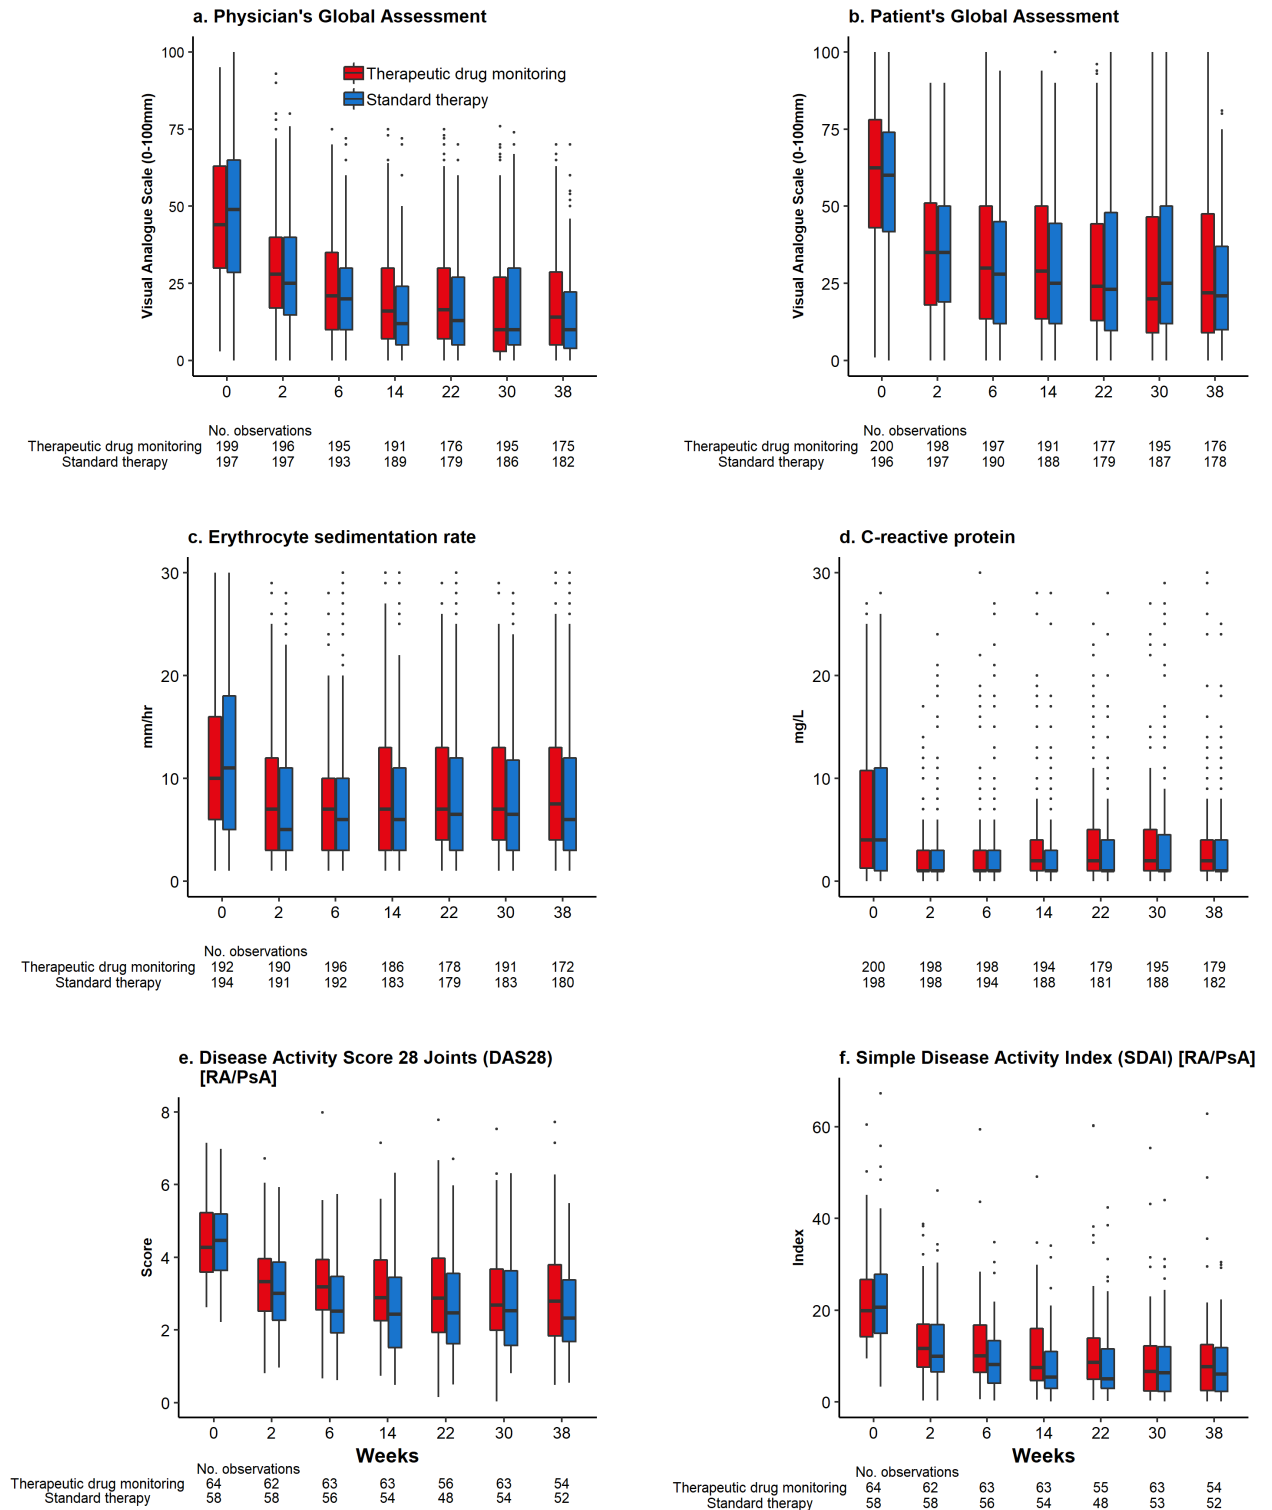

**g. Modified Health Assessment Questionnaire (MHAQ) [RA/PsA]**

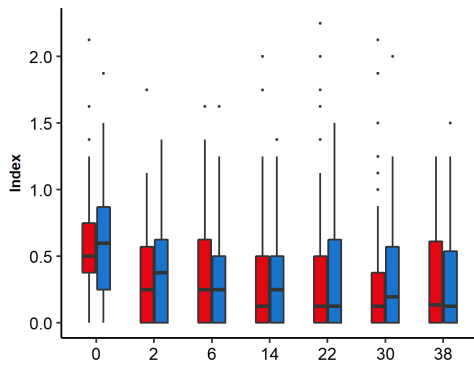

|                             | 0   | 2   | 6   | 14  | 22  | 30  | 38  |
|-----------------------------|-----|-----|-----|-----|-----|-----|-----|
| No. observations            | 122 | 120 | 118 | 117 | 104 | 120 | 107 |
| Therapeutic drug monitoring | 117 | 117 | 112 | 108 | 101 | 109 | 107 |
| Standard therapy            |     |     |     |     |     |     |     |

**h. Disease Activity in Psoriatic Arthritis (DAPSA) [PsA]**

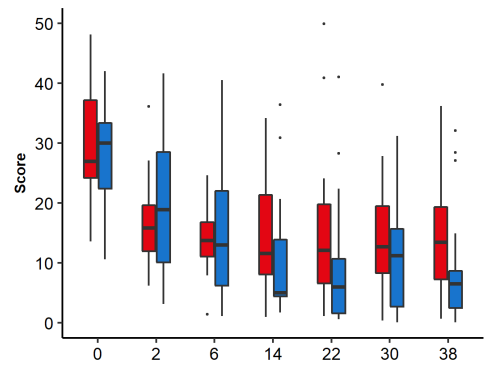

|                             | 0  | 2  | 6  | 14 | 22 | 30 | 38 |
|-----------------------------|----|----|----|----|----|----|----|
| No. observations            | 22 | 20 | 22 | 21 | 18 | 21 | 18 |
| Therapeutic drug monitoring | 20 | 20 | 18 | 19 | 18 | 18 | 16 |
| Standard therapy            |    |    |    |    |    |    |    |

**i. Bath Ankylosing Spondylitis Disease Activity Index (BASDAI) [SpA]**

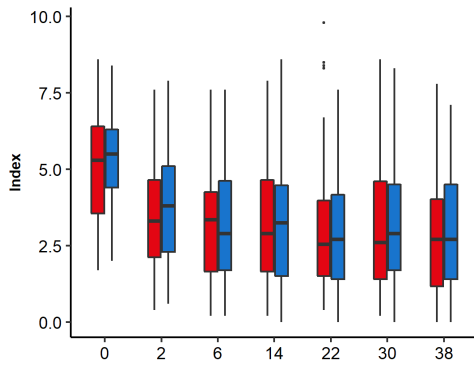

|                             | 0  | 2  | 6  | 14 | 22 | 30 | 38 |
|-----------------------------|----|----|----|----|----|----|----|
| No. observations            | 58 | 57 | 56 | 54 | 49 | 57 | 51 |
| Therapeutic drug monitoring | 58 | 57 | 56 | 55 | 54 | 57 | 55 |
| Standard therapy            |    |    |    |    |    |    |    |

**j. Ankylosing Spondylitis Disease Activity Score (ASDAS) [SpA]**

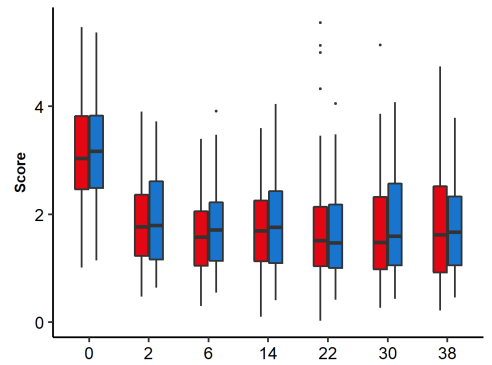

|                             | 0  | 2  | 6  | 14 | 22 | 30 | 38 |
|-----------------------------|----|----|----|----|----|----|----|
| No. observations            | 58 | 58 | 56 | 54 | 49 | 57 | 52 |
| Therapeutic drug monitoring | 58 | 58 | 56 | 55 | 54 | 57 | 55 |
| Standard therapy            |    |    |    |    |    |    |    |

**k. Partial Mayo Score (PMS) [UC]**

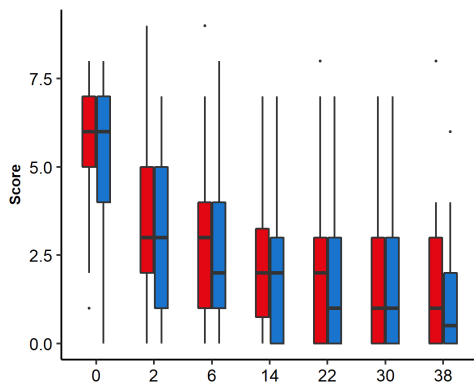

|                             | 0  | 2  | 6  | 14 | 22 | 30 | 38 |
|-----------------------------|----|----|----|----|----|----|----|
| No. observations            | 41 | 41 | 41 | 40 | 39 | 41 | 38 |
| Therapeutic drug monitoring | 39 | 39 | 39 | 36 | 37 | 37 | 35 |
| Standard therapy            |    |    |    |    |    |    |    |

**l. Harvey-Bradshaw Index (HBI) [CD]**

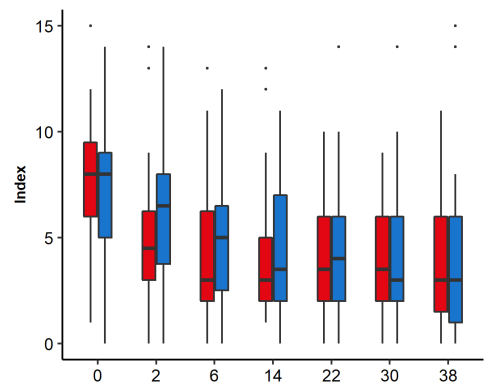

|                             | 0  | 2  | 6  | 14 | 22 | 30 | 38 |
|-----------------------------|----|----|----|----|----|----|----|
| No. observations            | 28 | 28 | 27 | 26 | 26 | 26 | 24 |
| Therapeutic drug monitoring | 29 | 29 | 29 | 29 | 28 | 28 | 27 |
| Standard therapy            |    |    |    |    |    |    |    |



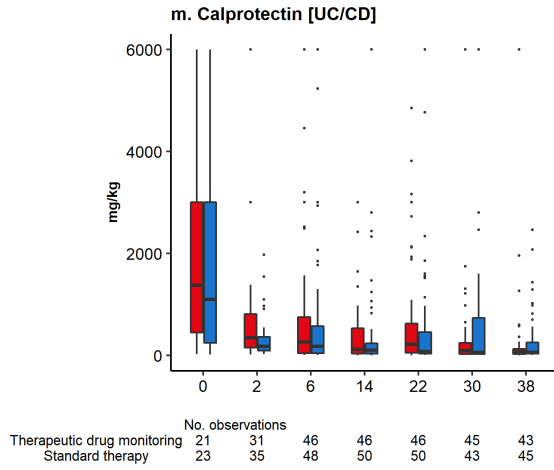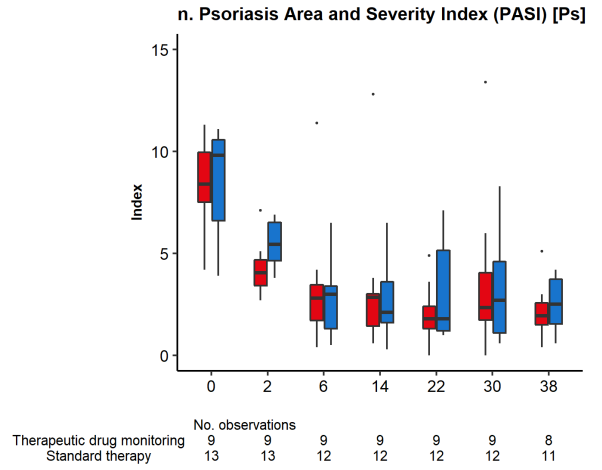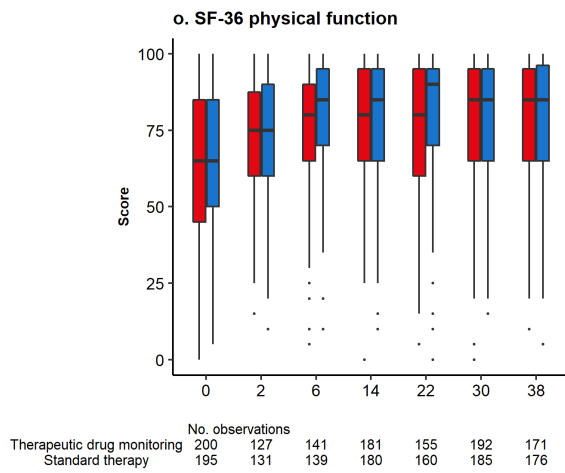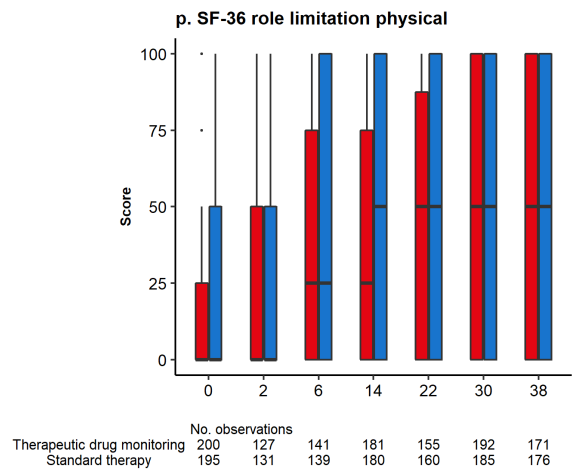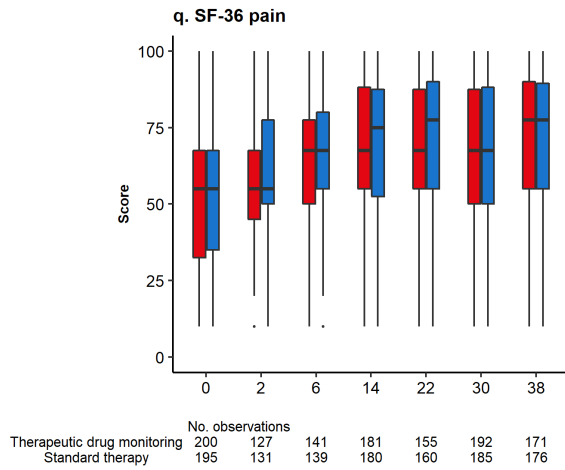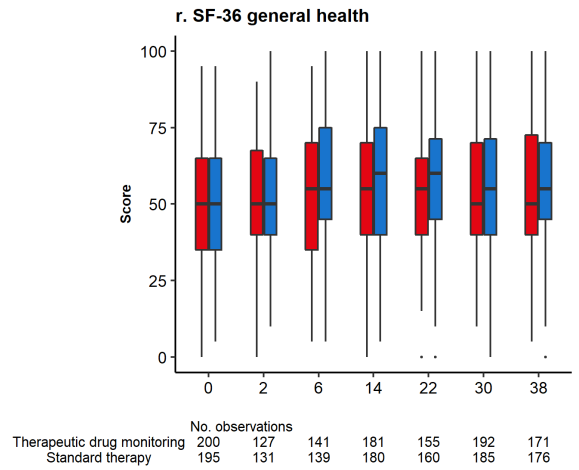

s. SF-36 emotional well-being

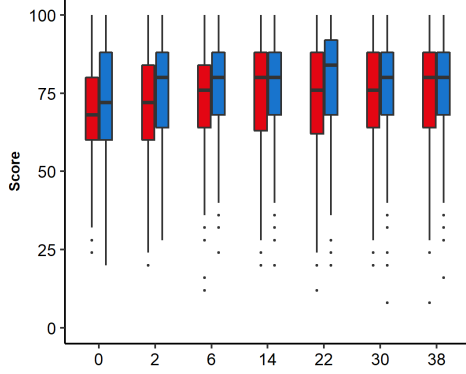

|                             | No. observations |     |     |     |     |     |     |
|-----------------------------|------------------|-----|-----|-----|-----|-----|-----|
| Therapeutic drug monitoring | 200              | 127 | 141 | 181 | 155 | 192 | 171 |
| Standard therapy            | 195              | 131 | 139 | 180 | 160 | 185 | 176 |

t. SF-36 role limitation emotional

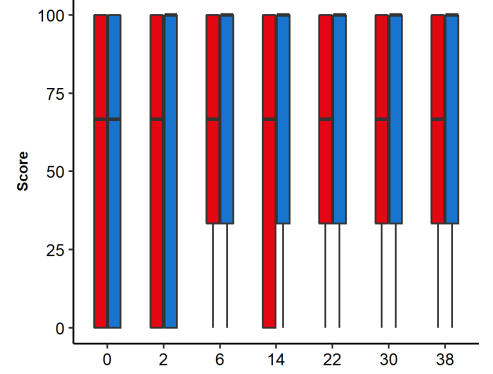

|                             | No. observations |     |     |     |     |     |     |
|-----------------------------|------------------|-----|-----|-----|-----|-----|-----|
| Therapeutic drug monitoring | 200              | 127 | 141 | 181 | 155 | 192 | 171 |
| Standard therapy            | 195              | 131 | 139 | 180 | 160 | 185 | 176 |

u. SF-36 social functioning

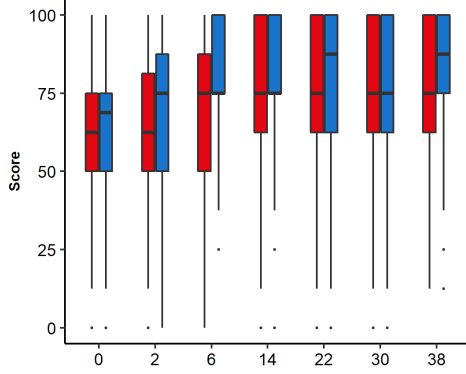

|                             | No. observations |     |     |     |     |     |     |
|-----------------------------|------------------|-----|-----|-----|-----|-----|-----|
| Therapeutic drug monitoring | 200              | 127 | 141 | 181 | 155 | 192 | 171 |
| Standard therapy            | 195              | 131 | 139 | 180 | 160 | 185 | 176 |

v. SF-36 role energy/fatigue

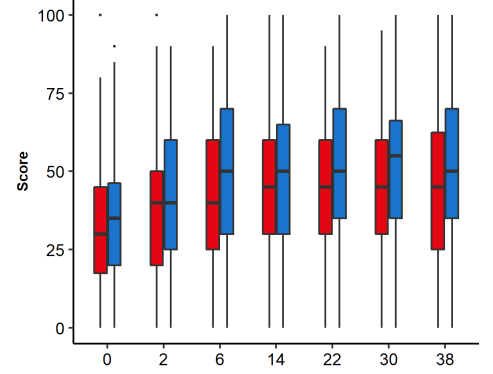

|                             | No. observations |     |     |     |     |     |     |
|-----------------------------|------------------|-----|-----|-----|-----|-----|-----|
| Therapeutic drug monitoring | 200              | 127 | 141 | 181 | 155 | 192 | 171 |
| Standard therapy            | 195              | 131 | 139 | 180 | 160 | 185 | 176 |

w. SF-36 physical component summary score

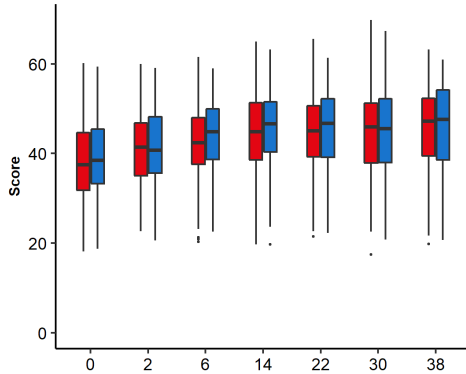

|                             | No. observations |     |     |     |     |     |     |
|-----------------------------|------------------|-----|-----|-----|-----|-----|-----|
| Therapeutic drug monitoring | 200              | 127 | 141 | 181 | 155 | 192 | 171 |
| Standard therapy            | 195              | 131 | 139 | 180 | 160 | 185 | 176 |

x. SF-36 mental component summary score

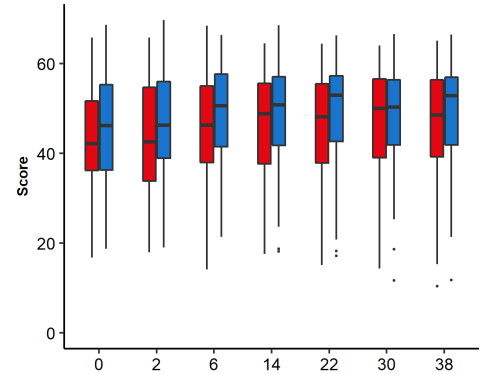

|                             | No. observations |     |     |     |     |     |     |
|-----------------------------|------------------|-----|-----|-----|-----|-----|-----|
| Therapeutic drug monitoring | 200              | 127 | 141 | 181 | 155 | 192 | 171 |
| Standard therapy            | 195              | 131 | 139 | 180 | 160 | 185 | 176 |

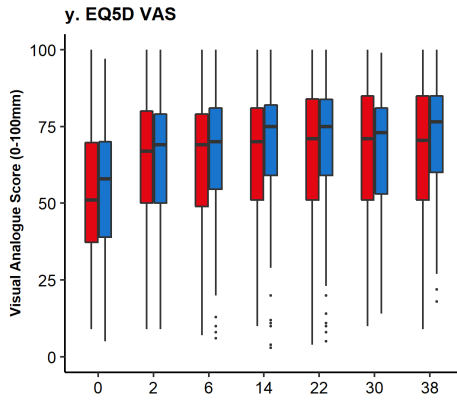

|                             | No. observations |     |     |     |     |     |     |
|-----------------------------|------------------|-----|-----|-----|-----|-----|-----|
| Therapeutic drug monitoring | 199              | 197 | 196 | 187 | 176 | 193 | 174 |
| Standard therapy            | 194              | 197 | 189 | 184 | 177 | 185 | 176 |

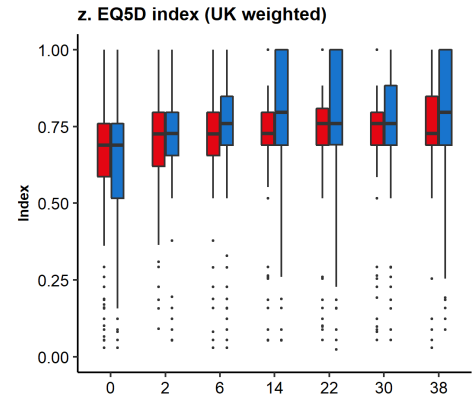

|                             | No. observations |     |     |     |     |     |     |
|-----------------------------|------------------|-----|-----|-----|-----|-----|-----|
| Therapeutic drug monitoring | 198              | 194 | 190 | 187 | 173 | 192 | 171 |
| Standard therapy            | 189              | 193 | 188 | 182 | 177 | 183 | 175 |

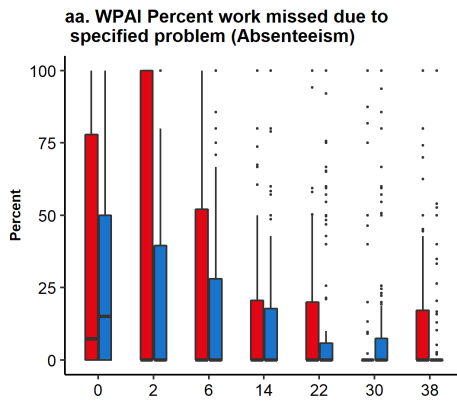

|                             | No. observations |     |     |     |     |     |     |
|-----------------------------|------------------|-----|-----|-----|-----|-----|-----|
| Therapeutic drug monitoring | 133              | 133 | 127 | 123 | 119 | 134 | 112 |
| Standard therapy            | 126              | 125 | 122 | 116 | 111 | 115 | 112 |

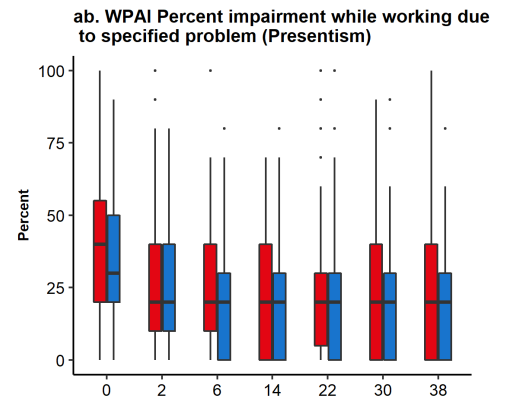

|                             | No. observations |     |     |     |     |     |     |
|-----------------------------|------------------|-----|-----|-----|-----|-----|-----|
| Therapeutic drug monitoring | 108              | 109 | 110 | 108 | 112 | 117 | 105 |
| Standard therapy            | 91               | 89  | 95  | 102 | 102 | 103 | 94  |

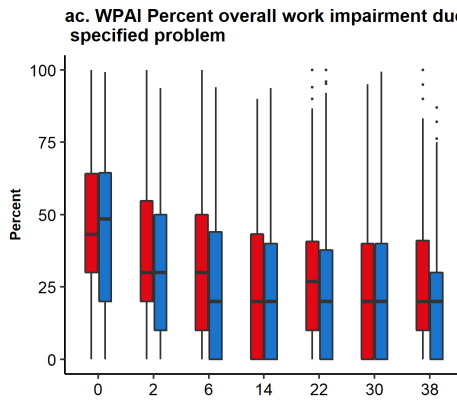

|                             | No. observations |     |     |     |     |     |     |
|-----------------------------|------------------|-----|-----|-----|-----|-----|-----|
| Therapeutic drug monitoring | 107              | 109 | 110 | 108 | 111 | 117 | 105 |
| Standard therapy            | 91               | 88  | 95  | 102 | 100 | 103 | 94  |

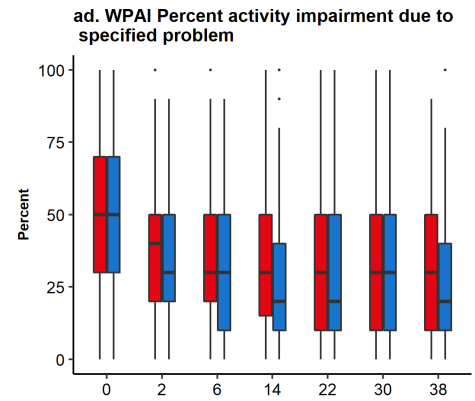

|                             | No. observations |     |     |     |     |     |     |
|-----------------------------|------------------|-----|-----|-----|-----|-----|-----|
| Therapeutic drug monitoring | 198              | 194 | 190 | 186 | 171 | 193 | 172 |
| Standard therapy            | 193              | 196 | 186 | 183 | 176 | 180 | 175 |

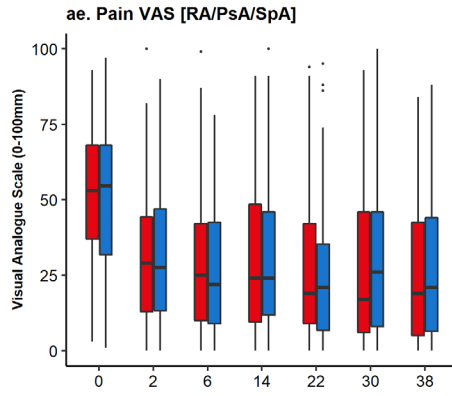

|                             | No. observations |     |     |     |     |     |     |
|-----------------------------|------------------|-----|-----|-----|-----|-----|-----|
| Therapeutic drug monitoring | 120              | 118 | 119 | 116 | 104 | 119 | 109 |
| Standard therapy            | 113              | 116 | 113 | 107 | 103 | 111 | 107 |

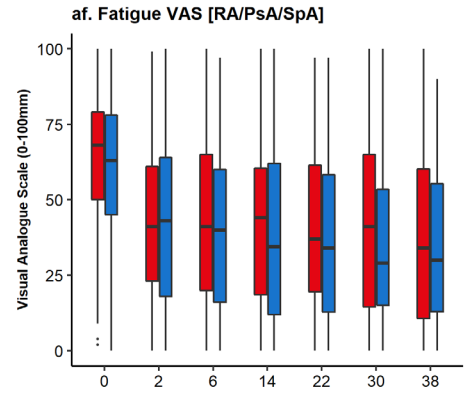

|                             | No. observations |     |     |     |     |     |     |
|-----------------------------|------------------|-----|-----|-----|-----|-----|-----|
| Therapeutic drug monitoring | 121              | 119 | 119 | 116 | 104 | 119 | 109 |
| Standard therapy            | 117              | 117 | 113 | 107 | 103 | 111 | 107 |

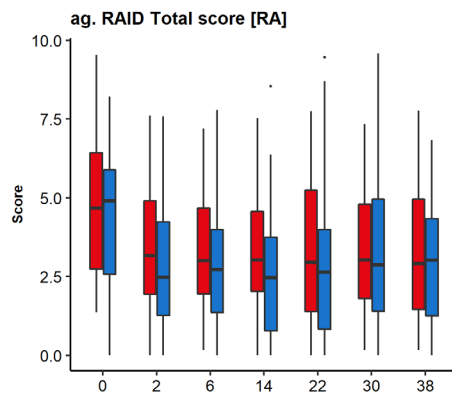

|                             | No. observations |    |    |    |    |    |    |
|-----------------------------|------------------|----|----|----|----|----|----|
| Therapeutic drug monitoring | 41               | 38 | 40 | 39 | 36 | 42 | 33 |
| Standard therapy            | 38               | 37 | 35 | 32 | 27 | 36 | 36 |

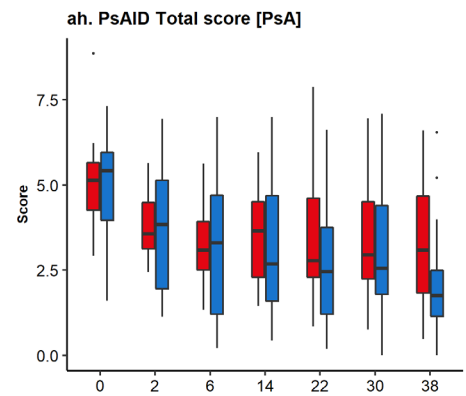

|                             | No. observations |    |    |    |    |    |    |
|-----------------------------|------------------|----|----|----|----|----|----|
| Therapeutic drug monitoring | 21               | 21 | 22 | 21 | 17 | 21 | 19 |
| Standard therapy            | 20               | 19 | 18 | 19 | 18 | 17 | 17 |

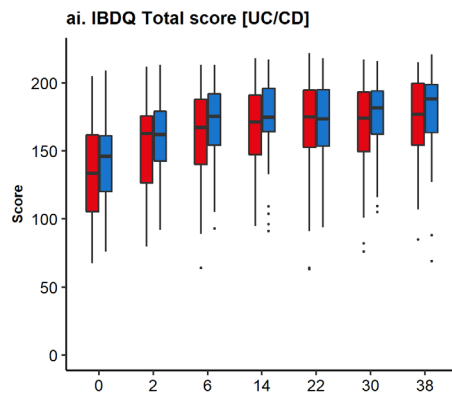

|                             | No. observations |    |    |    |    |    |    |
|-----------------------------|------------------|----|----|----|----|----|----|
| Therapeutic drug monitoring | 69               | 69 | 68 | 64 | 64 | 66 | 60 |
| Standard therapy            | 66               | 68 | 66 | 66 | 64 | 64 | 59 |

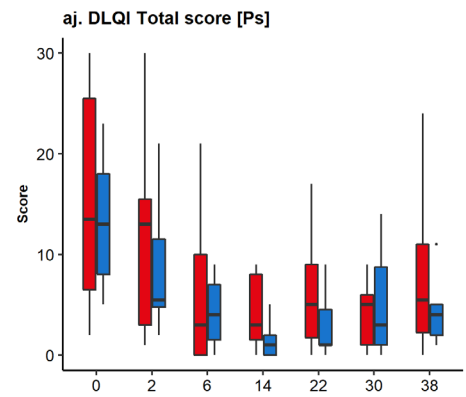

|                             | No. observations |    |   |    |    |   |    |
|-----------------------------|------------------|----|---|----|----|---|----|
| Therapeutic drug monitoring | 9                | 9  | 8 | 8  | 9  | 8 | 5  |
| Standard therapy            | 12               | 11 | 9 | 11 | 10 | 9 | 10 |

ak. DAS28 remission status [RA/PsA]

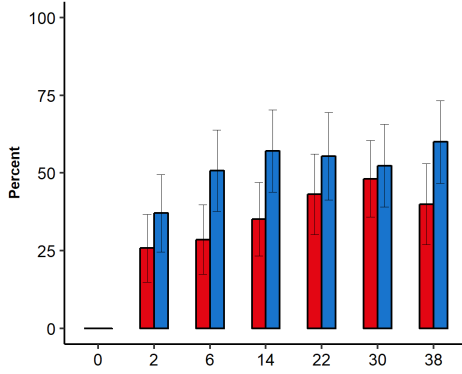

|                             | No. observations |    |    |    |    |    |    |
|-----------------------------|------------------|----|----|----|----|----|----|
| Therapeutic drug monitoring | 64               | 62 | 63 | 63 | 56 | 63 | 54 |
| Standard therapy            | 58               | 58 | 56 | 54 | 48 | 54 | 52 |

al. SDAI remission status [RA/PsA]

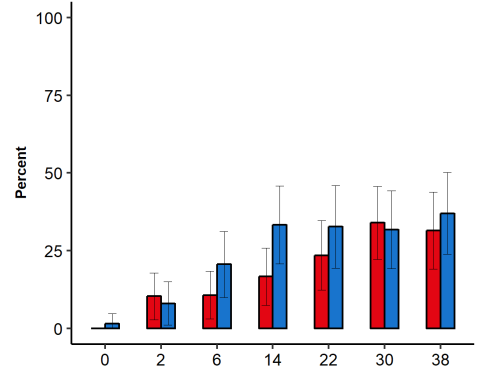

|                             | No. observations |    |    |    |    |    |    |
|-----------------------------|------------------|----|----|----|----|----|----|
| Therapeutic drug monitoring | 64               | 62 | 63 | 63 | 55 | 63 | 54 |
| Standard therapy            | 58               | 58 | 56 | 54 | 48 | 53 | 52 |

am. ACR/EULAR remission status [RA/PsA]

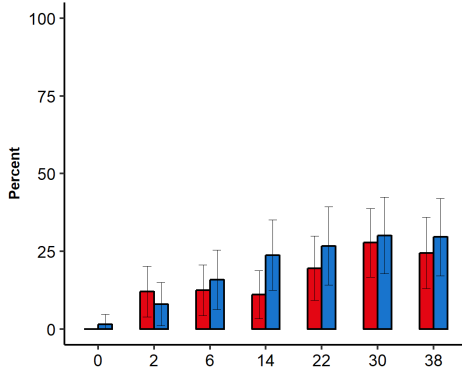

|                             | No. observations |    |    |    |    |    |    |
|-----------------------------|------------------|----|----|----|----|----|----|
| Therapeutic drug monitoring | 64               | 62 | 63 | 63 | 56 | 63 | 54 |
| Standard therapy            | 58               | 58 | 56 | 54 | 48 | 54 | 52 |

an. PMS remission status [UC]

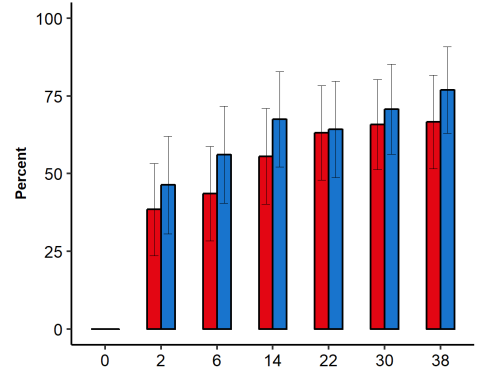

|                             | No. observations |    |    |    |    |    |    |
|-----------------------------|------------------|----|----|----|----|----|----|
| Therapeutic drug monitoring | 41               | 41 | 41 | 40 | 39 | 41 | 38 |
| Standard therapy            | 39               | 39 | 39 | 36 | 37 | 38 | 35 |

ao. HBI remission status [CD]

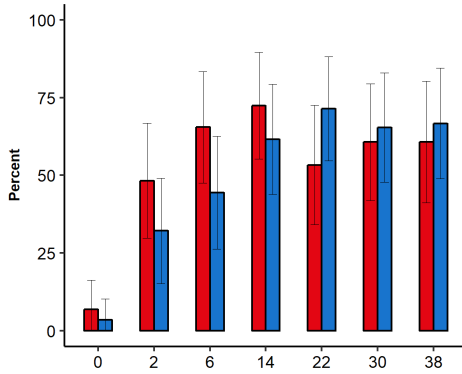

|                             | No. observations |    |    |    |    |    |    |
|-----------------------------|------------------|----|----|----|----|----|----|
| Therapeutic drug monitoring | 28               | 28 | 27 | 26 | 26 | 26 | 24 |
| Standard therapy            | 29               | 29 | 29 | 29 | 28 | 28 | 27 |

ap. PASI remission status [Ps]

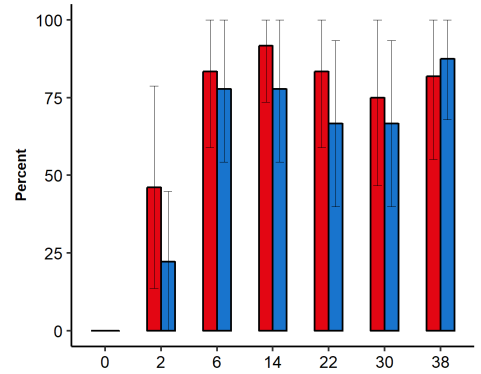

|                             | No. observations |    |    |    |    |    |    |
|-----------------------------|------------------|----|----|----|----|----|----|
| Therapeutic drug monitoring | 9                | 9  | 9  | 9  | 9  | 9  | 8  |
| Standard therapy            | 13               | 13 | 12 | 12 | 12 | 12 | 11 |

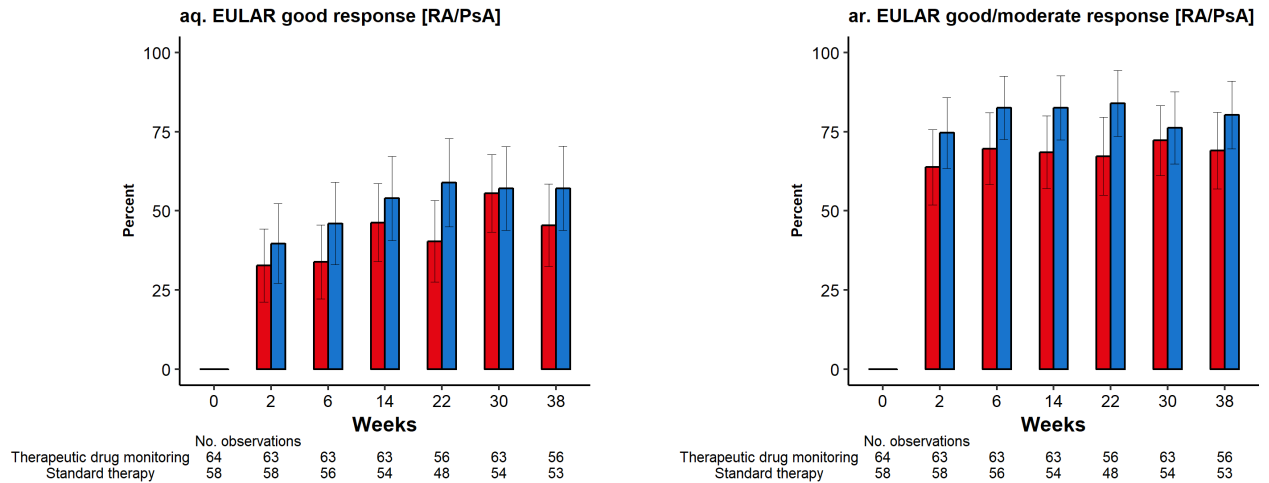

Red color denotes the therapeutic drug monitoring group, blue color denotes the standard therapy group. Boxes mark first and third quartiles (Interquartile range, IQR), the band inside the box is the second quartile (the median), while the whiskers indicate the highest and lowest values within 1.5 x the interquartile range. Dots denote individual patients (outliers).

a. Physician's global assessment of disease activity (Visual Analogue Scale (VAS) (0-100), b. Patient's global assessment of disease activity activity (VAS 0-100), c. Erythrocyte sedimentation rate, mm/h, d. C-reactive protein, mg/L, e. Disease Activity Score 28 joints (DAS28) assessed in RA and PsA, f. Simple Disease Activity Index (SDAI) assessed in RA and PsA, g. Modified Health Assessment Questionnaire (mHAQ) assessed in RA, PsA and SpA, h. Disease Activity in Psoriatic Arthritis (DAPSA) assessed in PsA, i. Bath Ankylosing Spondylitis Disease Activity Index (BASDAI) assessed in SpA, j. Ankylosing Spondylitis Disease Activity Score (ASDAS) assessed in SpA, k. Partial Mayo Score assessed in UC, l. Harvey-Bradshaw Index (HBI) assessed in CD, m. Fecal Calprotectin mg/kg assessed in UC and CD, n. Psoriasis Area and Severity Index (PASI) assessed in Ps, o. Short Form Health Survey t-scores using Norwegian norms (SF-36) physical function, p. SF-36 role limitation physical, q. SF-36 pain, r. SF-36 general health, s. SF-36 emotional well-being, t. SF-36 role limitation emotional, u. SF-36 social functioning, v. SF-36 role energy/fatigue, w. SF-36 physical component summary score, x. SF-36 mental component summary score, y. EuroQol questionnaire time trade-off United Kingdom weighted (EQ5D) visual analogue scale (VAS), z. EQ5D index aa. Work Productivity and Impairment questionnaire (WPAI) Percent work missed due to specified problem (Absenteeism), ab. WPAI Percent impairment while working due to specified problem (Presentism), ac. WPAI Percent overall work impairment due to specified problem, ad. WPAI Percent activity impairment due to specified problem, ae. Pain (VAS 0-100) assessed in RA, PsA and SpA, af. Fatigue (VAS 0-100) assessed in RA, PsA and SpA, ag. Rheumatoid Arthritis Impact of Disease total score (RAID) assessed in RA, ah. Psoriatic Arthritis Impact of Disease total score (PSAID) assessed in PsA, ai. Inflammatory Bowel Disease Questionnaire total score (IBDQ) in UC and CD, aj. Dermatology Life Quality Index total score (DLQI) in Ps and PsA, ak. Disease Activity Score 28 (DAS28) joints remission assessed in RA and PsA, al. Simple Disease Activity Index (SDAI) remission status assessed in RA and PsA, am. ACR/EULAR remission status assessed in RA and PsA, an. Partial Mayo Score (PMS) remission status assessed in UC, ao. Harvey-Bradshaw Index (HBI) remission status assessed in CD, ap. Psoriasis Area and Severity Index (PASI) remission status assessed in Ps, aq. EULAR good response assessed in RA and PsA, ar. EULAR moderate response assessed in RA and PsA  
Extended information regarding the endpoints is given in eTable 3 including range, anchors and clinical meaning.

Abbreviations: VAS, Visual analogue scale; RA, Rheumatoid arthritis; PsA, psoriatic arthritis; SpA, spondyloarthritis; UC, ulcerative colitis; CD, Crohn disease, Ps, psoriasis.

## eReferences

1. Prevoo ML, van 't Hof MA, Kuper HH, van Leeuwen MA, van de Putte LB, van Riel PL. Modified disease activity scores that include twenty-eight-joint counts. Development and validation in a prospective longitudinal study of patients with rheumatoid arthritis. *Arthritis and rheumatism* 1995;38(1):44-8. (In eng). DOI: 10.1002/art.1780380107.
2. England BR, Tjong BK, Bergman MJ, et al. 2019 Update of the American College of Rheumatology Recommended Rheumatoid Arthritis Disease Activity Measures. *Arthritis Care Res (Hoboken)* 2019;71(12):1540-1555. (In eng). DOI: 10.1002/acr.24042.
3. Aletaha D, Smolen J. The Simplified Disease Activity Index (SDAI) and the Clinical Disease Activity Index (CDAI): a review of their usefulness and validity in rheumatoid arthritis. *Clin Exp Rheumatol* 2005;23(5 Suppl 39):S100-8. (In eng).
4. Pincus T, Summey JA, Soraci SA, Jr., Wallston KA, Hummon NP. Assessment of patient satisfaction in activities of daily living using a modified Stanford Health Assessment Questionnaire. *Arthritis and rheumatism* 1983;26(11):1346-53. (In eng). DOI: 10.1002/art.1780261107.
5. Nell-Duxneuner VP, Stamm TA, Machold KP, Pflugbeil S, Aletaha D, Smolen JS. Evaluation of the appropriateness of composite disease activity measures for assessment of psoriatic arthritis. *Annals of the rheumatic diseases* 2010;69(3):546-9. (In eng). DOI: 10.1136/ard.2009.117945.
6. Lukas C, Landewé R, Sieper J, et al. Development of an ASAS-endorsed disease activity score (ASDAS) in patients with ankylosing spondylitis. *Annals of the rheumatic diseases* 2009;68(1):18-24. (In eng). DOI: 10.1136/ard.2008.094870.
7. Machado P, Landewé R, Lie E, et al. Ankylosing Spondylitis Disease Activity Score (ASDAS): defining cut-off values for disease activity states and improvement scores. *Annals of the rheumatic diseases* 2011;70(1):47-53. (In eng). DOI: 10.1136/ard.2010.138594.
8. Machado PM, Landewé RB, van der Heijde DM. Endorsement of definitions of disease activity states and improvement scores for the Ankylosing Spondylitis Disease Activity Score: results from OMERACT 10. *J Rheumatol* 2011;38(7):1502-6. (In eng). DOI: 10.3899/jrheum.110279.
9. Garrett S, Jenkinson T, Kennedy LG, Whitelock H, Gaisford P, Calin A. A new approach to defining disease status in ankylosing spondylitis: the Bath Ankylosing Spondylitis Disease Activity Index. *J Rheumatol* 1994;21(12):2286-91. (In eng).
10. Lewis JD, Chuai S, Nessel L, Lichtenstein GR, Aberra FN, Ellenberg JH. Use of the noninvasive components of the Mayo score to assess clinical response in ulcerative colitis. *Inflammatory bowel diseases* 2008;14(12):1660-6. (In eng). DOI: 10.1002/ibd.20520.
11. Schroeder KW, Tremaine WJ, Ilstrup DM. Coated oral 5-aminosalicylic acid therapy for mildly to moderately active ulcerative colitis. A randomized study. *The New England journal of medicine* 1987;317(26):1625-9. (In eng). DOI: 10.1056/nejm198712243172603.
12. Harvey RF, Bradshaw JM. A simple index of Crohn's-disease activity. *Lancet (London, England)* 1980;1(8167):514. (In eng). DOI: 10.1016/s0140-6736(80)92767-1.
13. Vermeire S, Schreiber S, Sandborn WJ, Dubois C, Rutgeerts P. Correlation between the Crohn's disease activity and Harvey-Bradshaw indices in assessing Crohn's disease severity. *Clinical gastroenterology and hepatology : the official clinical practice journal of the American Gastroenterological Association* 2010;8(4):357-63. (In eng). DOI: 10.1016/j.cgh.2010.01.001.
14. Best WR, Beckett JM, Singleton JW, Kern F, Jr. Development of a Crohn's disease activity index. National Cooperative Crohn's Disease Study. *Gastroenterology* 1976;70(3):439-44. (In eng).
15. Sipponen T, Kolho KL. Fecal calprotectin in diagnosis and clinical assessment of inflammatory bowel disease. *Scand J Gastroenterol* 2015;50(1):74-80. (In eng). DOI: 10.3109/00365521.2014.987809.
16. Vernia F, Di Ruscio M, Stefanelli G, Viscido A, Frieri G, Latella G. Is fecal calprotectin an accurate marker in the management of Crohn's disease? *J Gastroenterol Hepatol* 2020;35(3):390-400. (In eng). DOI: 10.1111/jgh.14950.
17. Fredriksson T, Pettersson U. Severe psoriasis--oral therapy with a new retinoid. *Dermatologica* 1978;157(4):238-44. (In eng). DOI: 10.1159/000250839.
18. Schmitt J, Wozel G. The psoriasis area and severity index is the adequate criterion to define severity in chronic plaque-type psoriasis. *Dermatology* 2005;210(3):194-9. (In eng). DOI: 10.1159/000083509.

19. Ware JE, Jr., Sherbourne CD. The MOS 36-item short-form health survey (SF-36). I. Conceptual framework and item selection. *Med Care* 1992;30(6):473-83. (In eng).
20. Brooks R. EuroQol: the current state of play. *Health Policy* 1996;37(1):53-72. (In eng). DOI: 10.1016/0168-8510(96)00822-6.
21. Reilly MC, Zbrozek AS, Dukes EM. The validity and reproducibility of a work productivity and activity impairment instrument. *Pharmacoeconomics* 1993;4(5):353-65. (In eng). DOI: 10.2165/00019053-199304050-00006.
22. Gossec L, Dougados M, Rincheval N, et al. Elaboration of the preliminary Rheumatoid Arthritis Impact of Disease (RAID) score: a EULAR initiative. *Annals of the rheumatic diseases* 2009;68(11):1680-5. (In eng). DOI: 10.1136/ard.2008.100271.
23. Gossec L, de Wit M, Kiltz U, et al. A patient-derived and patient-reported outcome measure for assessing psoriatic arthritis: elaboration and preliminary validation of the Psoriatic Arthritis Impact of Disease (PsAID) questionnaire, a 13-country EULAR initiative. *Annals of the rheumatic diseases* 2014;73(6):1012-9. (In eng). DOI: 10.1136/annrheumdis-2014-205207.
24. Guyatt G, Mitchell A, Irvine EJ, et al. A new measure of health status for clinical trials in inflammatory bowel disease. *Gastroenterology* 1989;96(3):804-10. (In eng).
25. Finlay AY, Khan GK. Dermatology Life Quality Index (DLQI)--a simple practical measure for routine clinical use. *Clin Exp Dermatol* 1994;19(3):210-6. (In eng). DOI: 10.1111/j.1365-2230.1994.tb01167.x.
26. Felson DT, Anderson JJ, Boers M, et al. American College of Rheumatology. Preliminary definition of improvement in rheumatoid arthritis. *Arthritis and rheumatism* 1995;38(6):727-35. (In eng). DOI: 10.1002/art.1780380602.
